# Supplementary material for: Evaluation of treadmill exercise effect on muscular lipid profiles of diabetic fatty rats by nanoflow liquid chromatography–tandem mass spectrometry
Source: PubMed Central journal article supplement (PMC4937420; doi:10.1038/srep29617), 2016-07-08
Supplement: srep29617-s1.pdf [file srep29617-s1.pdf]

# Supplementary Information

## Evaluation of treadmill exercise effect on muscular lipid profiles of diabetic fatty rats by nanoflow liquid chromatography–tandem mass spectrometry

Jong Cheol Lee,<sup>1</sup> Il Yong Kim,<sup>2,3</sup> Yeri Son,<sup>2,3</sup> Seul Kee Byeon,<sup>1</sup> Dong Hyun Yoon,<sup>3,4</sup> Jun Seok Son,<sup>3,4</sup> Han Sol Song,<sup>3,4</sup> Wook Song,<sup>3,4,5</sup> Je Kyung Seong,<sup>2,3\*</sup> and Myeong Hee Moon<sup>1,\*</sup>

<sup>1</sup>Department of Chemistry, Yonsei University, Seoul, 03722, Korea

<sup>2</sup>College of Veterinary Medicine, Seoul National University, Seoul, 08826, Korea

<sup>3</sup>Korea Mouse Phenotyping Center (KMPC), Seoul National University, Seoul, 08826, Korea

<sup>4</sup>Health and Exercise Science Laboratory, Institute of Sport Science, Seoul National University College of Education, Seoul, 08826, Korea

<sup>5</sup>Institute on Aging, Seoul National University College of Medicine, Seoul, 08826, Korea.

### Table of Contents

|                                         |    |
|-----------------------------------------|----|
| nLC–ESI–MS/MS of lipids                 | 2  |
| Structural determination of DAG and TAG | 4  |
| Figure S1                               | 5  |
| Figure S2                               | 6  |
| Figure S3                               | 7  |
| Figure S4                               | 8  |
| Table S1                                | 9  |
| Table S2                                | 10 |
| Table S3                                | 25 |
| Table S4                                | 29 |
| Table S5                                | 29 |

36

37 *nLC-ESI-MS/MS*

38

39 For the global search of lipids by nLC-ESI-MS/MS (ion trap), the column was prepared in  
40 the laboratory by packing Watcher ODS-P (3  $\mu\text{m}$  and 100  $\text{\AA}$ ) C18 resins (Isu Industry Corp.  
41 Seoul, Korea) into a pulled tip silica capillary tube (75  $\mu\text{m}$  I.D. with 360  $\mu\text{m}$  O.D.) under  $\text{N}_2$   
42 (1000 psi) to a column length of 7 cm. The pulled tip column was prepared by pulling one  
43 end of the silica tube with a flame to make a sharp needle so that ESI can be achieved without  
44 a separate emitter. The analytical column was connected to a PEEK microcross (IDEX, Oak  
45 Harbor, WA, USA), the other three ports of which were connected to a capillary tube (50  $\mu\text{m}$   
46 I.D.) from the LC pump, a Pt wire to supply electrical voltage for ESI, and a pressure  
47 capillary (20  $\mu\text{m}$  I.D.) for venting. The latter was used to provide a pressure for the  
48 controlling the column flow rate at 300 nL/min by varying its length and for venting the split  
49 flow. The end of the pressure tube was attached to the on/off switching valve so that it was  
50 closed during sample loading to column and opened during LC separation. Separation of  
51 lipids by nLC was achieved with gradient elution using two mobile phases:  $\text{H}_2\text{O}:\text{CH}_3\text{CN}$  (9:1,  
52 v/v) for mobile phase A and  $\text{CH}_3\text{OH}:\text{CH}_3\text{CN}:\text{isopropanol}$  (2:2:6, v/v/v) for phase B. To both  
53 mobile phase solutions, 5 mM  $\text{NH}_4\text{HCO}_2$  and 0.05%  $\text{NH}_4\text{OH}$  were added as modifiers, which  
54 were utilized in the positive and negative ion modes of MS analysis. The sample was loaded  
55 to an analytical column using mobile phase A with the switching valve off at 600 nL/min for  
56 15 min. After loading, gradient elution was initiated by ramping mobile phase B from 0% to  
57 55% for 1 min, 80% for 20 min, and 100% for 20 min. For column washing, mobile phase B  
58 was maintained at 100% for 30 min and then lowered to 0%. To minimize the dwell time  
59 during gradient elution, a flow rate of 15  $\mu\text{L}/\text{min}$  was applied with the switching valve on so  
60 that a final concentration of 300 nL/min was delivered to an analytical column and the rest of  
61 the flow exited through the vent tube. The injected amount of each sample was adjusted to 10  
62  $\mu\text{g}$  based on the weights of dried lipids. Two internal standards (IS), 1 pmol of 13:0/13:0-PC  
63 for the positive ion mode and 1 pmol of 15:0/15:0-PG for the negative ion mode, were  
64 injected together with 10  $\mu\text{g}$  of sample to compensate the fluctuation in MS intensity. For MS  
65 analysis, 3.0 kV of ESI voltage was applied. The mass ranges of detection were 400–1100  
66 and 350–1100 amu for the negative and positive ion modes, respectively. For each precursor  
67 run, 3 data-dependent CID analyses were accomplished with 40% normalized collision  
68 energy. Structural determination of lipid molecules from fragment ion spectra was performed

69 using the LiPilot computer algorithm (1), which was developed in our laboratory and  
70 confirmed by manual examinations.

71 For targeted quantitation of identified lipids from the non-targeted analysis, the selected  
72 reaction monitoring (SRM)-based quantitation method was performed by UPLC–ESI–  
73 MS/MS using a nanoACQUITY UPLC system (Waters, Milford, MA, USA) equipped with  
74 an autosampler and a TSQ Vantage triple stage quadrupole MS system (Thermo Scientific).  
75 The analytical column for UPLC was prepared in our laboratory in the same manner as that  
76 described at the above, but it was packed in a pulled tip capillary (100  $\mu\text{m}$  I.D.) using 1.7- $\mu\text{m}$   
77 ethylene bridged hybrid (BEH) particles (130  $\text{\AA}$ ) that were unpacked from an XBridge®  
78 BEH C18 column (2.1 mm  $\times$  100 mm, Waters). Before packing, the 5-mm length of the  
79 needle tip was filled with Watchers ODS-P (3  $\mu\text{m}$  and 100  $\text{\AA}$ ) to make a self-assembled frit,  
80 and the rest was packed with 1.7- $\mu\text{m}$  BEH particles. Configuration of the column connection  
81 with a vent tube and Pt wire, the injected amount of the lipid extract, and the type of mobile  
82 phase solutions was as described previously. Sample loading was performed at 1  $\mu\text{L}/\text{min}$  of  
83 mobile phase A for 10 min, and gradient elution was initiated by increasing mobile phase B to  
84 70% for 0.1 min, 90% for 4.9 min, and 100% for 8 min and maintained for 7 min. During  
85 gradient elution, the pump flow rate was maintained at 21  $\mu\text{L}/\text{min}$  to reduce the dwell time,  
86 and the final column flow rate was adjusted to 300 nL/min. The same amount of samples (10  
87  $\mu\text{g}$ ) and ISs (1 pmol) were injected for each analysis. The ESI voltage was fixed at 3.0 kV,  
88 but the collision energies for SRM analysis were varied according to lipid types as 20 (LPE  
89 and PE), 25 (DAG and TAG), 30 (Cer and MHC), 35 (LPG, PG, LPI, PI, LPS, PS, LPA, and  
90 PA), or 40 V (LPC, PC, and SM) with a scan width of  $m/z$  1.0 and a scan time of 0.01 s.  
91 Targeted quantitation was performed in the positive and negative ion modes, which were  
92 repeatedly switched during a single run. Lipid species detected during a positive ion mode  
93 cycle were LPC, PC, LPE, PE, SM, Cer, and MHC for  $[\text{M}+\text{H}]^+$  and DAG and TAG for  
94  $[\text{M}+\text{NH}_4]^+$ , and the remaining species were detected during a negative cycle for  $[\text{M}-\text{H}]^-$ . The  
95 types of characteristic fragment ions for SRM were protonated phosphocholine ions ( $m/z$  184)  
96 for LPC, PC, and SM, neutral loss of phosphoethanolamine ( $[\text{M}+\text{H}-141]^+$ ) for LPE and PE,  
97 LCB fragments ( $m/z$  264) for Cer and MHC,  $[\text{M}+\text{NH}_4-\text{RCOONH}_4]^+$  for DAG and TAG, and  
98 carboxylate anions of acyl chains ( $[\text{R}_1\text{COO}]^-$  and  $[\text{R}_2\text{COO}]^-$ ) for the remaining lipid species  
99 detected using the negative ion mode. Statistical analyses of data were accomplished using  
100 Minitab 15 software (<http://www.minitab.co.kr>) for principal component analysis and SPSS  
101 software (version 20.0, IBM Corp. Armonk, NY, USA) for the Mann–Whitney U test.

102

### 103 ***Structural determination of DAG and TAG***

104 The CID spectra in Fig. S3a show four acylium ions,  $[\text{RCO}]^+$  at  $m/z$  237.3, 239.3, 263.4,  
105 and 265.5, after the dissociation of acyl chains from TAG, corresponding to acyl chains of  
106 16:1, 16:0, 18:2, and 18:1, respectively. Fragment ions at  $m/z$  603.5, 601.6, 577.5, and 575.6  
107 represent the loss of acyl chains (from 16:1 to 18:1) in the form of ammonium carboxylate as  
108  $[\text{M}+\text{NH}_4\text{-RCOONH}_4]^+$  from the ammonium adduct form of TAG. Similarly, ions clustered  
109 between  $m/z$  313.5 and 341.5 represent the loss of two adjacent acyl chains in the form of  
110 carboxylic acid and ketene, namely  $[\text{M}+\text{NH}_4\text{-RCOONH}_4\text{-R}'\text{CH}=\text{C}=\text{O}]^+$ . From these spectra,  
111 the molecular structure of spectrum a) can be assigned as two isomeric TAG molecules,  
112 (16:0,18:1,18:2)-TAG and (16:1,18:1,18:1)-TAG, without a positional order of acyl chains. A  
113 slightly different fragmentation pattern was observed with DAG molecules in Fig. S3b,  
114 revealing the loss of ammonia from the ammonium adduct ion ( $[\text{M}+\text{NH}_4\text{-NH}_3]^+$ ) at  $m/z$  621.6,  
115 together with the loss of water ( $[\text{M}+\text{NH}_4\text{-NH}_3\text{-H}_2\text{O}]^+$ ) at  $m/z$  603.5 and the characteristic loss  
116 of acyl chains in the form of ammonium carboxylate as  $[\text{M}+\text{NH}_4\text{-RCOONH}_4]^+$  at  $m/z$  337.4,  
117 339.3, and 341.3, which were obtained from the dissociation of acyl chains 18:0, 18:1, and  
118 18:2. The CID spectra in Fig. S3b can be assigned as (18:0,18:2)-DAG and (18:1,18:1)-DAG  
119 without positional information for the acyl chains. The molecular structures of typical PLs  
120 can be readily obtained via CID experiments during nLC–ESI–MS/MS, as reported in earlier  
121 studies (refs. 23-26 in the text).

122

### 123 References

124 1. Lim, S., Byeon, S. K., Lee, J. Y. & Moon, M. H. Computational approach to structural  
125 identification of phospholipids using raw mass spectra from nanoflow liquid  
126 chromatography-electrospray ionization-tandem mass spectrometry. *J. Mass Spectrom.* **47**,  
127 1004-1014, (2012).

128

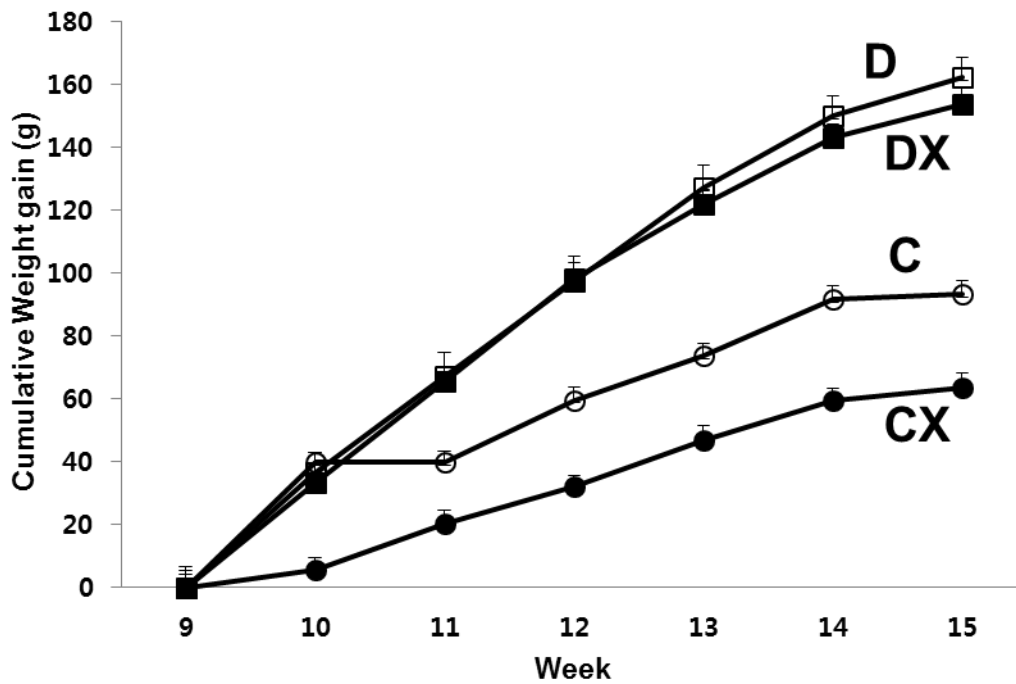

|                                     | ZLC           |                           | ZDF                        |                             |
|-------------------------------------|---------------|---------------------------|----------------------------|-----------------------------|
|                                     | C             | CX                        | D                          | DX                          |
| Weight at 9 <sup>th</sup> week (g)  | 178.67 ± 4.22 | 184.80 ± 6.50             | 246.40 ± 5.34 <sup>a</sup> | 235.00 ± 2.05 <sup>b</sup>  |
| Weight at 15 <sup>th</sup> week (g) | 272.00 ± 4.41 | 248.40 ± 4.71             | 408.80 ± 6.25 <sup>a</sup> | 388.83 ± 4.79 <sup>bc</sup> |
| difference (g)                      | 93.33 ± 4.31  | 63.60 ± 5.42 <sup>a</sup> | 162.40 ± 4.75 <sup>a</sup> | 153.83 ± 5.83 <sup>b</sup>  |

<sup>a</sup> $P < 0.05$  vs. C group; <sup>b</sup> $P < 0.05$  vs. CX group; <sup>c</sup> $P < 0.05$  vs. D group.

130

131

132 Figure S1. Plot showing the cumulative body weight gains of animals during the period of  
 133 exercise and measured weight values at weeks 9 and 15

134

135

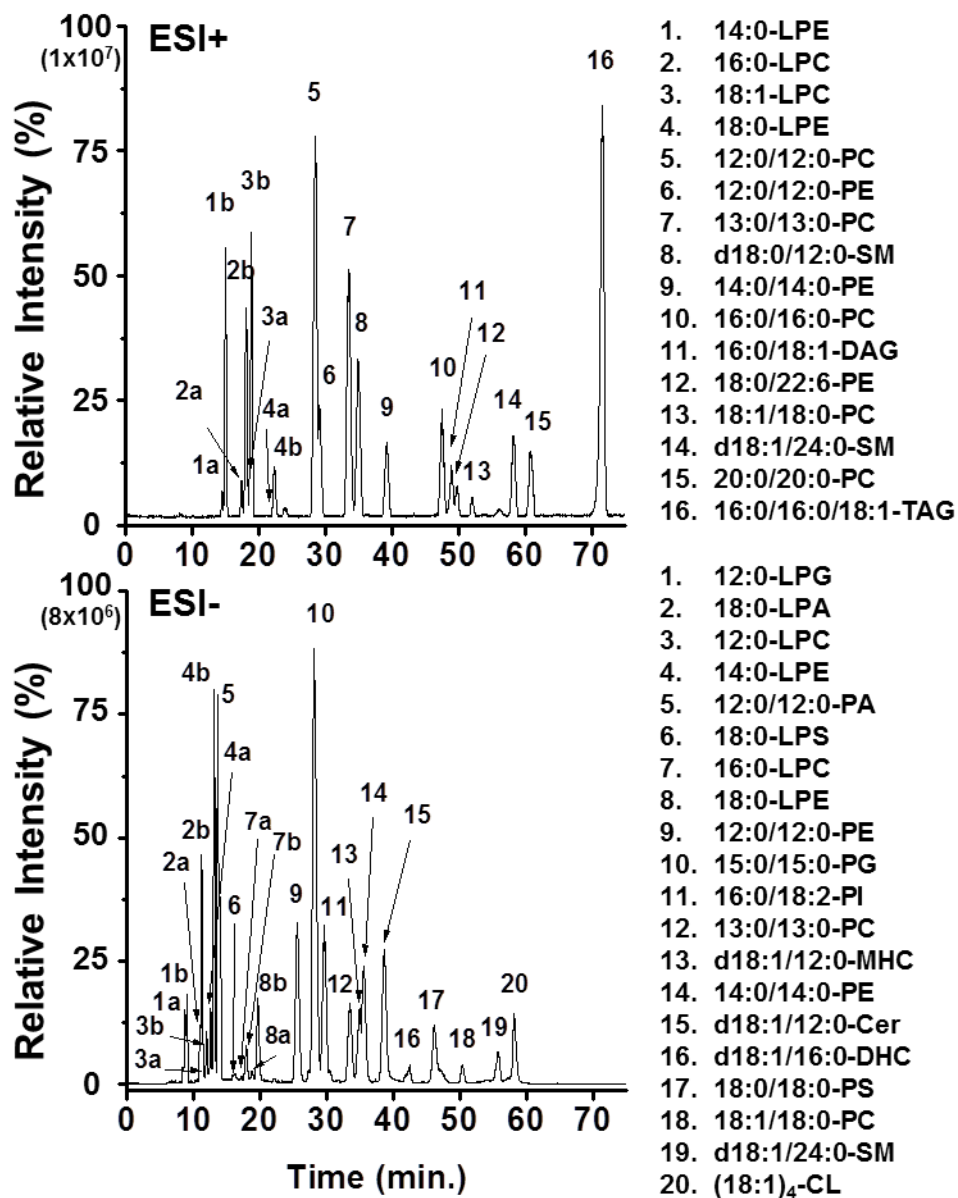

136  
137

138 Figure S2. Base peak chromatograms of standard lipid mixtures obtained by nLC-ESI-  
139 MS/MS in the positive (top) and negative (bottom) ion modes.

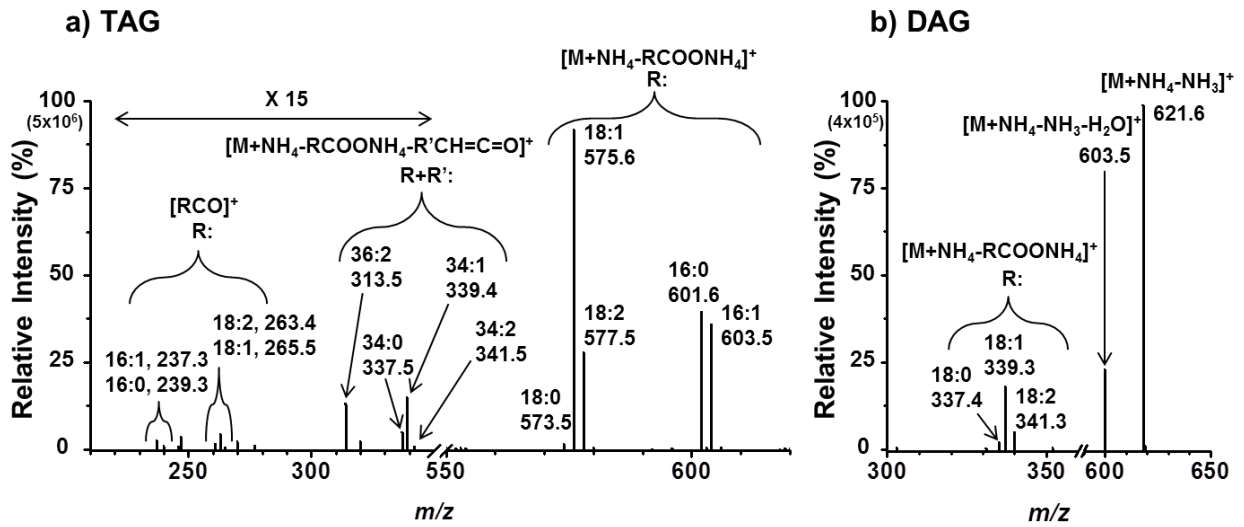

Figure S3. CID spectra assigned for a) 52:3-TAG isomeric forms ( $m/z$  874.7,  $[M+NH_4]^+$ ,  $t_r = 60.86$  min) and b) 36:2-DAG ( $m/z$  638.5,  $[M+NH_4]^+$ ,  $t_r = 49.57$  min) obtained by nLC-ESI-MS/MS analysis of a pooled soleus lipid sample from group D.

141  
142  
143  
144  
145  
146  
147  
148  
149  
150  
151  
152  
153  
154  
155  
156  
157  
158  
159  
160  
161  
162  
163  
164  
165  
166  
167  
168  
169  
170  
171  
172  
173  
174  
175





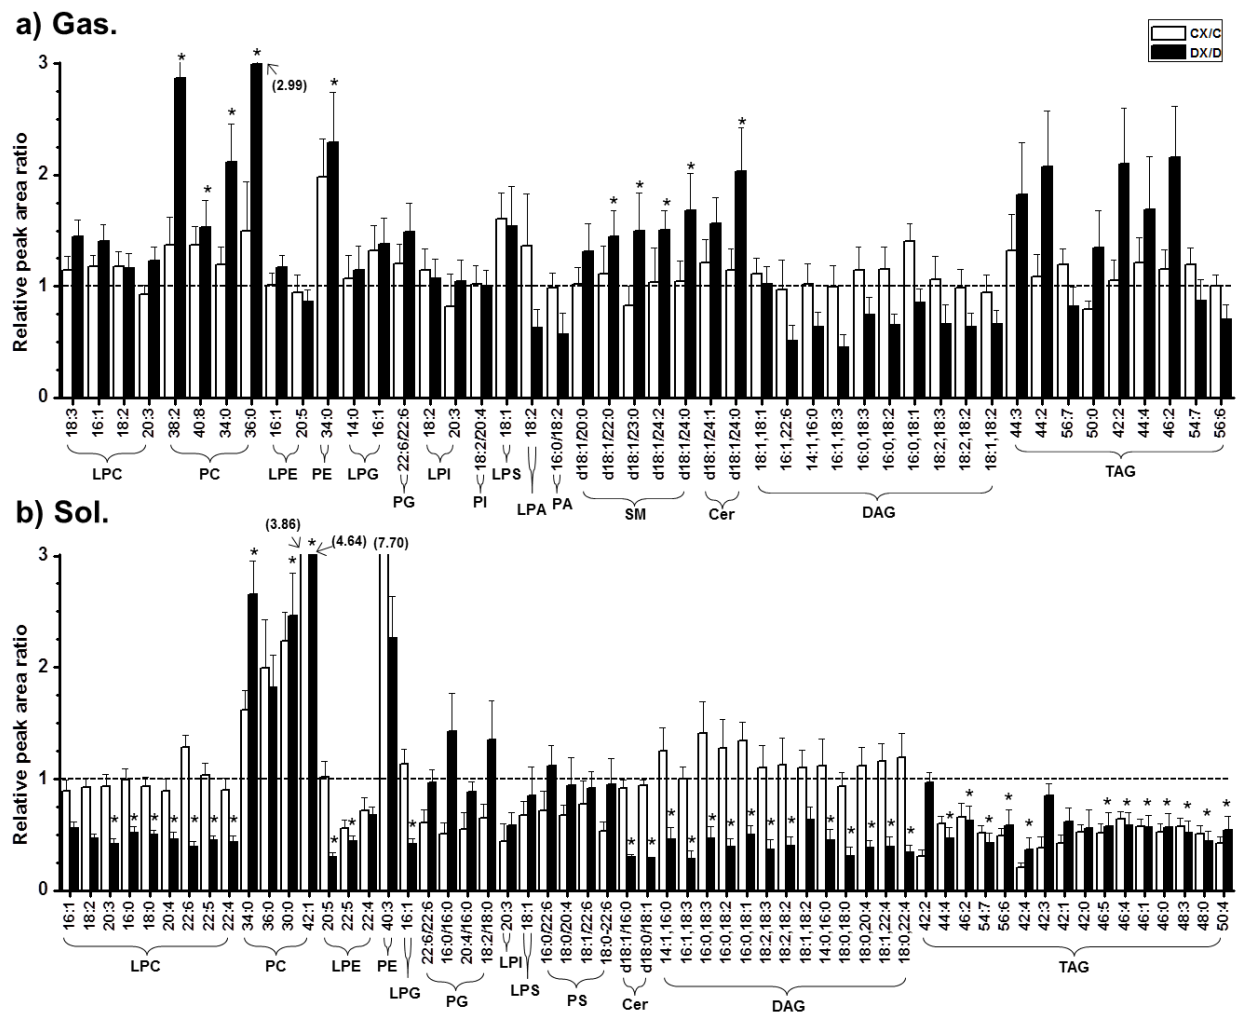

177  
 178  
 179  
 180

Figure S4. Fold changes (CX/C and DX/D) of lipids species (D/C > 3-fold with p < 0.01) from Table S3. The species marked with asterisk (\*) showed recovery trends sorted in Table 2a.

181 Table S1. Fasted body and tissue weights and fasted plasma glucose levels after 7 weeks of  
 182 physical exercise (percentage (%) values are based on the relative amount of each organ or  
 183 tissue relative to body weight).  
 184

|                              | ZLC           |                            | ZDF                        |                             |
|------------------------------|---------------|----------------------------|----------------------------|-----------------------------|
|                              | C             | CX                         | D                          | DX                          |
| body weight (g)              | 264.25 ± 4.00 | 244.28 ± 3.53 <sup>a</sup> | 396.52 ± 6.35 <sup>a</sup> | 387.25 ± 5.82 <sup>b</sup>  |
| epididymal fat (g)           | 1.73 ± 0.06   | 1.54 ± 0.07                | 8.75 ± 0.40 <sup>a</sup>   | 8.05 ± 0.48 <sup>b</sup>    |
| (%)                          | 0.66 ± 0.02   | 0.63 ± 0.03                | 2.20 ± 0.07 <sup>a</sup>   | 2.07 ± 0.10 <sup>b</sup>    |
| liver (g)                    | 7.27 ± 0.14   | 6.72 ± 0.11 <sup>a</sup>   | 16.89 ± 1.01 <sup>a</sup>  | 15.83 ± 0.67 <sup>b</sup>   |
| (%)                          | 2.75 ± 0.08   | 2.75 ± 0.04                | 4.26 ± 0.24 <sup>a</sup>   | 4.08 ± 0.12 <sup>b</sup>    |
| gastrocnemius (g)            | 2.57 ± 0.04   | 2.36 ± 0.01 <sup>a</sup>   | 2.19 ± 0.04                | 2.35 ± 0.07 <sup>bc</sup>   |
| (%)                          | 0.97 ± 0.01   | 0.97 ± 0.01                | 0.55 ± 0.01 <sup>a</sup>   | 0.61 ± 0.03 <sup>b</sup>    |
| soleus (g)                   | 0.26 ± 0.01   | 0.23 ± 0.00 <sup>a</sup>   | 0.25 ± 0.01 <sup>a</sup>   | 0.27 ± 0.00                 |
| (%)                          | 0.10 ± 0.00   | 0.10 ± 0.00                | 0.06 ± 0.00 <sup>a</sup>   | 0.07 ± 0.00 <sup>bc</sup>   |
| fasted blood glucose (mg/dL) | 165.67 ± 8.98 | 144.40 ± 0.93              | 226.40 ± 7.78 <sup>a</sup> | 210.00 ± 12.15 <sup>c</sup> |

<sup>a</sup>p < 0.05 vs. C group; <sup>b</sup>p < 0.05 vs. CX group; <sup>c</sup>p < 0.05 vs. D group

Table S2. a) Peak area of lipid species (vs. IS) from both tissue samples of the control (C), control after exercise (CX), diabetes (D), and diabetes after exercise (DX) groups obtained by nLC–ESI–MS/MS (The molecular structures of PC, PE, and TAG species are expressed with the total chain lengths, but detailed molecular structures of corresponding isomers for PC and PE identified from qualitative analysis are listed in b) and c) and the possible combinations of acyl chain structures for TAG species are listed in d). Species marked with <sup>a, b, c</sup> were isomers quantified individually because these isomers were separated as different molecular structures in nUPLC–ESI–MS/MS.).

a)

| class       | acyl chain   | <i>m/z</i>   | gastrocnemius      |              |                    |                    | soleus             |                    |                     |              |
|-------------|--------------|--------------|--------------------|--------------|--------------------|--------------------|--------------------|--------------------|---------------------|--------------|
|             |              |              | C                  | CX           | D                  | DX                 | C                  | CX                 | D                   | DX           |
| <b>LPC</b>  | 14:0         | 468.3        | 0.02 ± 0.00        | 0.03 ± 0.00  | 0.05 ± 0.00        | 0.05 ± 0.00        | 0.07 ± 0.00        | 0.06 ± 0.00        | 0.18 ± 0.02         | 0.08 ± 0.01  |
|             | <b>16:1</b>  | <b>494.3</b> | <b>0.08 ± 0.00</b> | 0.09 ± 0.01  | <b>0.47 ± 0.04</b> | 0.66 ± 0.05        | <b>0.23 ± 0.02</b> | 0.21 ± 0.02        | <b>1.29 ± 0.12</b>  | 0.72 ± 0.04  |
|             | 16:0         | 496.4        | 3.77 ± 0.22        | 4.55 ± 0.23  | 8.97 ± 0.77        | 7.89 ± 0.61        | <b>7.42 ± 0.56</b> | 7.33 ± 0.54        | <b>35.58 ± 2.95</b> | 18.34 ± 1.24 |
|             | <b>18:3</b>  | <b>518.5</b> | <b>0.02 ± 0.00</b> | 0.02 ± 0.00  | <b>0.07 ± 0.01</b> | 0.10 ± 0.01        | 0.12 ± 0.01        | 0.09 ± 0.01        | 0.33 ± 0.03         | 0.12 ± 0.01  |
|             | <b>18:2</b>  | <b>520.5</b> | <b>2.10 ± 0.17</b> | 2.48 ± 0.19  | <b>9.83 ± 0.95</b> | 11.37 ± 0.81       | <b>8.04 ± 0.51</b> | 7.41 ± 0.51        | <b>31.39 ± 2.46</b> | 14.5 ± 0.90  |
|             | 18:1         | 522.4        | 1.22 ± 0.07        | 1.40 ± 0.09  | 3.55 ± 0.26        | 4.52 ± 0.33        | 5.20 ± 0.42        | 5.34 ± 0.42        | 13.66 ± 1.26        | 7.31 ± 0.45  |
|             | <b>18:0</b>  | <b>524.3</b> | 2.67 ± 0.20        | 4.08 ± 0.31  | 3.59 ± 0.33        | 3.72 ± 0.37        | <b>7.97 ± 0.51</b> | 7.41 ± 0.46        | <b>34.87 ± 2.15</b> | 17.45 ± 0.91 |
|             | <b>20:4</b>  | <b>544.3</b> | 2.53 ± 0.16        | 2.27 ± 0.18  | 5.22 ± 0.52        | 6.00 ± 0.47        | <b>4.36 ± 0.38</b> | 3.90 ± 0.32        | <b>15.63 ± 1.67</b> | 7.16 ± 0.64  |
|             | <b>20:3</b>  | <b>546.5</b> | <b>0.25 ± 0.02</b> | 0.23 ± 0.02  | <b>1.14 ± 0.08</b> | 1.40 ± 0.10        | <b>0.48 ± 0.04</b> | 0.44 ± 0.03        | <b>4.01 ± 0.41</b>  | 1.65 ± 0.14  |
|             | <b>22:6</b>  | <b>568.4</b> | 1.52 ± 0.13        | 1.61 ± 0.18  | 2.72 ± 0.21        | 2.75 ± 0.21        | <b>2.93 ± 0.21</b> | 3.75 ± 0.20        | <b>12.06 ± 1.27</b> | 4.68 ± 0.42  |
|             | <b>22:5</b>  | <b>570.3</b> | 0.47 ± 0.03        | 0.54 ± 0.04  | 1.33 ± 0.09        | 1.38 ± 0.08        | <b>0.89 ± 0.08</b> | 0.91 ± 0.06        | <b>3.20 ± 0.22</b>  | 1.43 ± 0.10  |
| <b>22:4</b> | <b>572.4</b> | 0.06 ± 0.00  | 0.06 ± 0.00        | 0.13 ± 0.01  | 0.19 ± 0.01        | <b>0.14 ± 0.01</b> | 0.12 ± 0.01        | <b>0.48 ± 0.05</b> | 0.21 ± 0.02         |              |
| <b>PC</b>   | <b>30:0</b>  | <b>706.5</b> | 0.33 ± 0.03        | 0.37 ± 0.05  | 0.33 ± 0.05        | 0.59 ± 0.06        | <b>0.61 ± 0.06</b> | 1.37 ± 0.08        | <b>0.19 ± 0.02</b>  | 0.46 ± 0.04  |
|             | 32:2         | 730.6        | 0.96 ± 0.10        | 1.28 ± 0.13  | 1.17 ± 0.12        | 2.56 ± 0.19        | 0.97 ± 0.09        | 1.75 ± 0.12        | 0.43 ± 0.04         | 1.27 ± 0.09  |
|             | 32:1         | 732.5        | 1.27 ± 0.12        | 2.03 ± 0.16  | 2.79 ± 0.35        | 6.02 ± 0.82        | 1.49 ± 0.16        | 4.10 ± 0.35        | 1.26 ± 0.09         | 3.38 ± 0.24  |
|             | 32:0         | 734.5        | 7.29 ± 0.52        | 8.95 ± 0.80  | 4.79 ± 0.65        | 8.60 ± 1.26        | 7.64 ± 0.46        | 16.72 ± 0.81       | 3.43 ± 0.30         | 7.12 ± 0.66  |
|             | 34:4         | 754.5        | 1.14 ± 0.09        | 1.27 ± 0.10  | 0.51 ± 0.05        | 1.05 ± 0.09        | 0.64 ± 0.05        | 1.21 ± 0.08        | 0.32 ± 0.03         | 0.81 ± 0.06  |
|             | 34:3         | 756.5        | 3.78 ± 0.53        | 5.05 ± 0.61  | 5.85 ± 0.75        | 12.08 ± 1.01       | 3.36 ± 0.30        | 5.79 ± 0.43        | 2.20 ± 0.20         | 6.58 ± 0.50  |
|             | 34:2         | 758.6        | 54.20 ± 4.89       | 84.17 ± 7.39 | 58.09 ± 7.84       | 98.26 ± 8.83       | 53.06 ± 4.93       | 127.63 ± 7.50      | 34.16 ± 1.99        | 67.24 ± 4.40 |

| class | acyl chain        | $m/z$        | gastrocnemius      |              |                    |              | soleus             |                |                    |              |
|-------|-------------------|--------------|--------------------|--------------|--------------------|--------------|--------------------|----------------|--------------------|--------------|
|       |                   |              | C                  | CX           | D                  | DX           | C                  | CX             | D                  | DX           |
|       | 34:1              | 760.5        | 40.07 ± 2.74       | 57.45 ± 4.67 | 32.37 ± 2.04       | 63.20 ± 4.09 | 40.12 ± 4.10       | 104.35 ± 5.36  | 23.91 ± 1.50       | 50.91 ± 3.50 |
|       | <b>34:0</b>       | <b>762.5</b> | <b>6.02 ± 0.60</b> | 7.19 ± 0.60  | <b>1.57 ± 0.22</b> | 3.31 ± 0.27  | <b>5.52 ± 0.26</b> | 8.94 ± 0.85    | <b>1.49 ± 0.13</b> | 3.95 ± 0.30  |
|       | 36:5 <sup>a</sup> | 780.5        | 2.17 ± 0.26        | 3.04 ± 0.28  | 1.12 ± 0.15        | 2.02 ± 0.26  | 1.12 ± 0.07        | 1.80 ± 0.11    | 0.55 ± 0.07        | 3.24 ± 0.19* |
|       | 36:5 <sup>b</sup> | 780.6        | 2.53 ± 0.23        | 2.98 ± 0.31  | 1.96 ± 0.26        | 4.08 ± 0.31  | 1.31 ± 0.13        | 2.34 ± 0.16    | 1.24 ± 0.16        | 3.35 ± 0.34  |
|       | 36:5 <sup>c</sup> | 780.5        | 2.42 ± 0.22        | 2.90 ± 0.28  | 1.28 ± 0.32        | 1.80 ± 0.15  | 1.64 ± 0.08        | 3.63 ± 0.20    | 0.86 ± 0.16        | 2.19 ± 0.48  |
|       | 36:4 <sup>a</sup> | 782.5        | 38.28 ± 3.81       | 47.40 ± 7.06 | 18.63 ± 0.69       | 33.80 ± 1.74 | 21.73 ± 3.35       | 48.07 ± 2.89   | 14.54 ± 0.89       | 33.95 ± 2.67 |
|       | 36:4 <sup>b</sup> | 782.5        | 38.36 ± 6.13       | 39.69 ± 6.33 | 23.22 ± 4.25       | 37.46 ± 4.02 | 21.25 ± 1.69       | 36.62 ± 2.57   | 13.76 ± 1.07       | 33.00 ± 2.53 |
|       | 36:3              | 784.5        | 20.88 ± 1.47       | 30.16 ± 2.84 | 21.96 ± 2.30       | 35.62 ± 3.41 | 21.16 ± 2.39       | 64.62 ± 5.06   | 18.15 ± 1.17       | 36.13 ± 3.55 |
|       | 36:2              | 786.5        | 34.90 ± 2.91       | 55.83 ± 4.30 | 24.41 ± 1.86       | 47.62 ± 3.70 | 59.73 ± 2.10       | 116.96 ± 12.35 | 35.47 ± 2.56       | 77.11 ± 5.39 |
|       | 36:1              | 788.5        | 16.75 ± 1.87       | 24.28 ± 2.59 | 6.39 ± 0.79        | 15.00 ± 1.31 | 21.56 ± 1.15       | 37.37 ± 3.02   | 10.43 ± 0.95       | 29.55 ± 2.07 |
|       | <b>36:0</b>       | <b>790.6</b> | <b>0.56 ± 0.11</b> | 0.84 ± 0.19  | <b>0.12 ± 0.02</b> | 0.36 ± 0.05  | <b>3.02 ± 0.43</b> | 6.00 ± 0.99    | <b>0.79 ± 0.10</b> | 1.43 ± 0.14  |
|       | 38:7              | 804.5        | 4.60 ± 0.70        | 6.86 ± 1.01  | 1.96 ± 0.31        | 3.49 ± 0.37  | 3.50 ± 0.27        | 10.33 ± 0.47   | 2.19 ± 0.26        | 6.53 ± 0.51  |
|       | 38:6 <sup>a</sup> | 806.6        | 19.35 ± 2.46       | 27.61 ± 4.51 | 15.14 ± 0.84       | 24.57 ± 1.56 | 20.95 ± 1.43       | 36.05 ± 4.27   | 11.52 ± 0.96       | 28.75 ± 2.33 |
|       | 38:6 <sup>b</sup> | 806.5        | 20.47 ± 3.25       | 23.95 ± 4.89 | 10.23 ± 1.95       | 16.29 ± 1.39 | 21.04 ± 1.76       | 35.87 ± 3.57   | 10.82 ± 1.14       | 23.79 ± 2.60 |
|       | 38:5              | 808.5        | 17.17 ± 1.79       | 25.91 ± 2.52 | 12.11 ± 1.69       | 17.73 ± 1.88 | 20.73 ± 1.23       | 33.32 ± 1.53   | 9.28 ± 0.83        | 19.26 ± 1.90 |
|       | 38:4              | 810.5        | 32.45 ± 2.76       | 43.77 ± 3.24 | 13.13 ± 1.64       | 20.48 ± 1.68 | 36.35 ± 2.08       | 81.87 ± 6.20   | 19.58 ± 1.49       | 44.18 ± 2.74 |
|       | 38:3              | 812.5        | 9.05 ± 0.73        | 13.01 ± 0.97 | 4.83 ± 0.53        | 8.39 ± 0.40  | 11.16 ± 0.42       | 19.17 ± 1.83   | 9.97 ± 1.15        | 19.82 ± 1.20 |
|       | <b>38:2</b>       | <b>814.6</b> | <b>5.14 ± 0.77</b> | 7.06 ± 0.75  | <b>1.13 ± 0.15</b> | 3.26 ± 0.27  | 0.86 ± 0.17        | 4.93 ± 0.27    | 1.72 ± 0.24        | 4.88 ± 0.45  |
|       | <b>40:8</b>       | <b>830.5</b> | <b>7.57 ± 0.67</b> | 10.39 ± 0.86 | <b>1.98 ± 0.27</b> | 3.03 ± 0.25  | 19.00 ± 1.48       | 38.13 ± 2.30   | 7.94 ± 0.88        | 20.59 ± 2.34 |
|       | 40:7              | 832.6        | 4.39 ± 0.49        | 6.18 ± 0.72  | 3.42 ± 0.57        | 4.50 ± 0.34  | 8.14 ± 0.69        | 16.88 ± 1.21   | 3.63 ± 0.33        | 8.50 ± 0.90  |
|       | 40:6              | 834.5        | 7.91 ± 0.77        | 11.50 ± 1.11 | 6.75 ± 0.95        | 10.15 ± 0.93 | 16.98 ± 1.41       | 34.46 ± 3.77   | 6.73 ± 0.82        | 15.83 ± 1.69 |
|       | 40:5              | 836.5        | 3.71 ± 0.35        | 5.46 ± 0.43  | 2.88 ± 0.38        | 4.61 ± 0.35  | 6.85 ± 0.34        | 12.93 ± 0.86   | 2.48 ± 0.31        | 6.14 ± 0.54  |
|       | 40:4              | 838.5        | 1.90 ± 0.14        | 2.94 ± 0.25  | 1.35 ± 0.16        | 1.90 ± 0.15  | 1.48 ± 0.08        | 4.09 ± 0.27    | 0.91 ± 0.16        | 2.66 ± 0.32  |
|       | 40:1              | 844.5        | 0.50 ± 0.08        | 0.72 ± 0.11  | 0.34 ± 0.07        | 0.46 ± 0.06  | 1.29 ± 0.15        | 6.51 ± 0.80*   | 0.43 ± 0.08        | 1.81 ± 0.21* |

| class | acyl chain        | $m/z$        | gastrocnemius      |             |                    |              | soleus             |              |                    |              |
|-------|-------------------|--------------|--------------------|-------------|--------------------|--------------|--------------------|--------------|--------------------|--------------|
|       |                   |              | C                  | CX          | D                  | DX           | C                  | CX           | D                  | DX           |
| LPE   | 40:0              | 846.6        | 0.11 ± 0.02        | 0.08 ± 0.01 | 0.07 ± 0.02        | 0.06 ± 0.01  | 0.40 ± 0.05        | 0.74 ± 0.07  | 0.14 ± 0.02        | 0.38 ± 0.02  |
|       | 42:10             | 854.5        | 0.97 ± 0.09        | 0.82 ± 0.06 | 0.54 ± 0.08        | 0.46 ± 0.03  | 2.39 ± 0.20        | 5.32 ± 0.36  | 1.24 ± 0.20        | 1.79 ± 0.13  |
|       | <b>42:1</b>       | <b>872.5</b> | 0.43 ± 0.08        | 0.49 ± 0.09 | 0.28 ± 0.07        | 0.43 ± 0.05  | <b>1.12 ± 0.18</b> | 4.31 ± 0.76* | <b>0.36 ± 0.07</b> | 1.67 ± 0.20* |
|       | <b>16:1</b>       | <b>452.4</b> | <b>0.01 ± 0.00</b> | 0.01 ± 0.00 | <b>0.05 ± 0.00</b> | 0.06 ± 0.00  | 0.02 ± 0.00        | 0.02 ± 0.00  | 0.03 ± 0.00        | 0.02 ± 0.00  |
|       | 16:0              | 454.3        | 0.19 ± 0.01        | 0.16 ± 0.02 | 0.30 ± 0.02        | 0.32 ± 0.03  | 0.23 ± 0.03        | 0.25 ± 0.03  | 0.34 ± 0.04        | 0.28 ± 0.02  |
|       | 18:2              | 478.4        | 0.20 ± 0.02        | 0.16 ± 0.01 | 0.35 ± 0.03        | 0.42 ± 0.03  | 0.44 ± 0.03        | 0.37 ± 0.02  | 0.41 ± 0.05        | 0.34 ± 0.02  |
|       | 18:1              | 480.3        | 0.26 ± 0.03        | 0.38 ± 0.07 | 0.53 ± 0.04        | 0.65 ± 0.05  | 0.48 ± 0.03        | 0.53 ± 0.12  | 0.65 ± 0.06        | 0.32 ± 0.02  |
|       | 18:0              | 482.5        | 0.37 ± 0.04        | 0.25 ± 0.02 | 0.52 ± 0.05        | 0.58 ± 0.06  | 1.04 ± 0.08        | 0.88 ± 0.06  | 1.29 ± 0.07        | 0.70 ± 0.05  |
|       | <b>20:5</b>       | <b>500.3</b> | <b>0.01 ± 0.00</b> | 0.01 ± 0.00 | <b>0.03 ± 0.00</b> | 0.03 ± 0.00  | <b>0.02 ± 0.00</b> | 0.02 ± 0.00  | <b>0.07 ± 0.00</b> | 0.02 ± 0.00* |
|       | 20:4              | 502.4        | 0.25 ± 0.02        | 0.19 ± 0.02 | 0.33 ± 0.02        | 0.28 ± 0.02  | 0.37 ± 0.03        | 0.26 ± 0.02  | 1.10 ± 0.13        | 0.58 ± 0.04  |
|       | 20:3              | 504.3        | 0.02 ± 0.00        | 0.01 ± 0.00 | 0.03 ± 0.00        | 0.03 ± 0.00  | 0.03 ± 0.00        | 0.02 ± 0.00  | 0.09 ± 0.01        | 0.05 ± 0.01  |
|       | 22:6              | 526.5        | 1.29 ± 0.11        | 1.11 ± 0.11 | 1.61 ± 0.12        | 1.27 ± 0.11  | 1.34 ± 0.11        | 0.92 ± 0.08  | 2.59 ± 0.14        | 1.78 ± 0.10  |
|       | <b>22:5</b>       | <b>528.4</b> | 0.44 ± 0.05        | 0.30 ± 0.04 | 0.59 ± 0.06        | 0.53 ± 0.05  | <b>0.44 ± 0.04</b> | 0.24 ± 0.02  | <b>1.46 ± 0.11</b> | 0.64 ± 0.06  |
|       | <b>22:4</b>       | <b>530.4</b> | 0.11 ± 0.01        | 0.07 ± 0.01 | 0.11 ± 0.01        | 0.11 ± 0.01  | <b>0.09 ± 0.01</b> | 0.07 ± 0.01  | <b>0.28 ± 0.02</b> | 0.19 ± 0.02  |
| PE    | 34:3              | 714.5        | 0.01 ± 0.00        | 0.02 ± 0.00 | 0.02 ± 0.00        | 0.04 ± 0.00  | 0.01 ± 0.00        | 0.02 ± 0.00  | 0.01 ± 0.00        | 0.05 ± 0.00* |
|       | 34:2              | 716.5        | 0.32 ± 0.03        | 0.72 ± 0.08 | 0.29 ± 0.04        | 0.78 ± 0.08  | 0.28 ± 0.03        | 0.70 ± 0.05  | 0.23 ± 0.02        | 0.81 ± 0.07* |
|       | 34:1              | 718.5        | 0.11 ± 0.01        | 0.28 ± 0.04 | 0.09 ± 0.01        | 0.32 ± 0.03* | 0.11 ± 0.01        | 0.30 ± 0.02  | 0.22 ± 0.02        | 0.43 ± 0.03  |
|       | <b>34:0</b>       | <b>720.6</b> | <b>0.05 ± 0.01</b> | 0.09 ± 0.01 | <b>0.01 ± 0.00</b> | 0.03 ± 0.00  | 0.05 ± 0.00        | 0.12 ± 0.01  | 0.04 ± 0.00        | 0.11 ± 0.01  |
|       | 36:5              | 738.5        | 0.07 ± 0.01        | 0.17 ± 0.02 | 0.07 ± 0.01        | 0.15 ± 0.01  | 0.07 ± 0.01        | 0.22 ± 0.01* | 0.02 ± 0.00        | 0.06 ± 0.00  |
|       | 36:4 <sup>a</sup> | 740.5        | 0.41 ± 0.05        | 0.61 ± 0.07 | 0.14 ± 0.02        | 0.42 ± 0.06  | 0.37 ± 0.02        | 0.29 ± 0.02  | 0.18 ± 0.01        | 0.72 ± 0.06* |
|       | 36:4 <sup>b</sup> | 740.5        | 0.24 ± 0.04        | 0.68 ± 0.07 | 0.21 ± 0.03        | 0.39 ± 0.07  | 0.19 ± 0.02        | 0.34 ± 0.03  | 0.20 ± 0.01        | 0.60 ± 0.05* |
|       | 36:3              | 742.6        | 0.35 ± 0.04        | 0.80 ± 0.09 | 0.28 ± 0.04        | 0.66 ± 0.05  | 0.42 ± 0.03        | 1.09 ± 0.06  | 0.26 ± 0.02        | 0.92 ± 0.09* |
|       | 36:2              | 744.5        | 2.57 ± 0.27        | 5.97 ± 0.57 | 1.65 ± 0.24        | 4.50 ± 0.39  | 1.60 ± 0.20        | 6.47 ± 0.35  | 1.94 ± 0.18        | 4.21 ± 0.43  |
| 36:1  | 746.5             | 0.43 ± 0.05  | 0.85 ± 0.07        | 0.19 ± 0.03 | 0.54 ± 0.05        | 0.29 ± 0.02  | 0.71 ± 0.06        | 0.49 ± 0.04  | 0.81 ± 0.07        |              |

| class      | acyl chain        | $m/z$        | gastrocnemius      |              |                    |             | soleus             |              |                    |              |
|------------|-------------------|--------------|--------------------|--------------|--------------------|-------------|--------------------|--------------|--------------------|--------------|
|            |                   |              | C                  | CX           | D                  | DX          | C                  | CX           | D                  | DX           |
|            | 38:7              | 762.5        | 0.04 ± 0.00        | 0.08 ± 0.01  | 0.06 ± 0.01        | 0.14 ± 0.02 | 0.02 ± 0.00        | 0.05 ± 0.00  | 0.04 ± 0.00        | 0.14 ± 0.01* |
|            | 38:6 <sup>a</sup> | 764.5        | 0.53 ± 0.09        | 1.27 ± 0.17  | 0.49 ± 0.10        | 0.94 ± 0.18 | 0.62 ± 0.05        | 1.37 ± 0.08  | 0.36 ± 0.04        | 1.20 ± 0.14* |
|            | 38:6 <sup>b</sup> | 764.6        | 0.50 ± 0.07        | 0.67 ± 0.09  | 0.49 ± 0.05        | 0.58 ± 0.08 | 0.53 ± 0.03        | 0.81 ± 0.05  | 0.24 ± 0.02        | 0.98 ± 0.05* |
|            | 38:5              | 766.5        | 0.63 ± 0.06        | 1.29 ± 0.13  | 0.62 ± 0.12        | 0.94 ± 0.09 | 0.69 ± 0.07        | 0.95 ± 0.06  | 0.38 ± 0.04        | 1.21 ± 0.13* |
|            | 38:4              | 768.5        | 4.24 ± 0.39        | 7.70 ± 0.96  | 2.08 ± 0.34        | 3.53 ± 0.27 | 3.23 ± 0.27        | 8.26 ± 0.31  | 2.77 ± 0.15        | 7.21 ± 0.64  |
|            | 38:3              | 770.6        | 0.72 ± 0.06        | 1.33 ± 0.14  | 0.53 ± 0.08        | 0.86 ± 0.06 | 0.70 ± 0.05        | 0.98 ± 0.07  | 0.41 ± 0.07        | 1.43 ± 0.14* |
|            | 38:2              | 772.5        | 0.07 ± 0.01        | 0.17 ± 0.02  | 0.04 ± 0.01        | 0.10 ± 0.01 | 0.07 ± 0.00        | 0.13 ± 0.01  | 0.10 ± 0.00        | 0.30 ± 0.02  |
|            | 40:8              | 788.6        | 1.34 ± 0.18        | 2.09 ± 0.33  | 0.77 ± 0.17        | 0.99 ± 0.14 | 0.73 ± 0.15        | 1.25 ± 0.23  | 0.52 ± 0.10        | 1.53 ± 0.26  |
|            | 40:7              | 790.5        | 0.65 ± 0.07        | 1.50 ± 0.16  | 0.69 ± 0.12        | 0.88 ± 0.11 | 0.94 ± 0.06        | 1.90 ± 0.20  | 0.45 ± 0.05        | 1.27 ± 0.11  |
|            | 40:6              | 792.6        | 5.76 ± 0.51        | 13.56 ± 1.46 | 3.40 ± 0.57        | 6.17 ± 0.47 | 6.36 ± 0.49        | 11.39 ± 0.88 | 3.42 ± 0.20        | 9.72 ± 1.07  |
|            | 40:5              | 794.5        | 1.96 ± 0.14        | 3.99 ± 0.42  | 1.30 ± 0.21        | 2.36 ± 0.17 | 1.07 ± 0.09        | 3.21 ± 0.18  | 1.41 ± 0.17        | 2.81 ± 0.35  |
|            | 40:4              | 796.6        | 0.62 ± 0.05        | 1.15 ± 0.10  | 0.42 ± 0.07        | 0.69 ± 0.05 | 0.47 ± 0.02        | 1.09 ± 0.08  | 0.35 ± 0.02        | 0.85 ± 0.08  |
|            | <b>40:3</b>       | <b>798.6</b> | 0.04 ± 0.01        | 0.08 ± 0.01  | 0.01 ± 0.00        | 0.03 ± 0.00 | <b>0.01 ± 0.00</b> | 0.11 ± 0.01* | <b>0.05 ± 0.00</b> | 0.11 ± 0.02  |
| <b>LPG</b> | <b>14:0</b>       | <b>455.4</b> | <b>0.01 ± 0.00</b> | 0.01 ± 0.00  | <b>0.03 ± 0.00</b> | 0.03 ± 0.00 | 0.03 ± 0.00        | 0.02 ± 0.00  | 0.06 ± 0.01        | 0.02 ± 0.00* |
|            | <b>16:1</b>       | <b>481.5</b> | <b>0.01 ± 0.00</b> | 0.02 ± 0.00  | <b>0.07 ± 0.01</b> | 0.10 ± 0.01 | <b>0.05 ± 0.01</b> | 0.06 ± 0.00  | <b>0.31 ± 0.02</b> | 0.13 ± 0.01  |
|            | 16:0              | 483.3        | 0.20 ± 0.04        | 0.17 ± 0.01  | 0.55 ± 0.12        | 0.59 ± 0.09 | 2.53 ± 0.27        | 1.55 ± 0.12  | 2.69 ± 0.30        | 0.71 ± 0.06* |
|            | 18:2              | 507.5        | 0.37 ± 0.04        | 0.46 ± 0.05  | 0.80 ± 0.08        | 0.91 ± 0.08 | 3.03 ± 0.36        | 1.71 ± 0.20  | 3.40 ± 0.41        | 0.73 ± 0.09* |
|            | 18:1              | 509.4        | 0.52 ± 0.10        | 0.58 ± 0.06  | 0.95 ± 0.16        | 1.12 ± 0.16 | 3.06 ± 0.31        | 2.19 ± 0.22  | 4.27 ± 0.68        | 1.10 ± 0.10* |
|            | 18:0              | 511.4        | 0.06 ± 0.01        | 0.07 ± 0.01  | 0.09 ± 0.02        | 0.10 ± 0.02 | 0.34 ± 0.04        | 0.45 ± 0.03  | 0.68 ± 0.09        | 0.18 ± 0.02* |
| <b>PG</b>  | 16:1/16:0         | 719.5        | 0.06 ± 0.01        | 0.08 ± 0.01  | 0.09 ± 0.01        | 0.14 ± 0.01 | 0.04 ± 0.01        | 0.03 ± 0.00  | 0.03 ± 0.00        | 0.04 ± 0.00  |
|            | 18:1/14:0         | 719.5        | 0.04 ± 0.01        | 0.05 ± 0.01  | 0.06 ± 0.01        | 0.08 ± 0.01 | 0.04 ± 0.01        | 0.04 ± 0.00  | 0.03 ± 0.00        | 0.04 ± 0.00  |
|            | <b>16:0/16:0</b>  | <b>721.6</b> | 0.35 ± 0.05        | 0.31 ± 0.04  | 0.17 ± 0.02        | 0.26 ± 0.04 | <b>0.20 ± 0.02</b> | 0.10 ± 0.01  | <b>0.06 ± 0.01</b> | 0.08 ± 0.01  |
|            | 18:1/16:1         | 745.5        | 0.25 ± 0.03        | 0.28 ± 0.02  | 0.32 ± 0.03        | 0.31 ± 0.02 | 0.35 ± 0.03        | 0.29 ± 0.02  | 0.31 ± 0.03        | 0.34 ± 0.04  |
|            | 18:2/16:0         | 745.5        | 1.89 ± 0.36        | 3.70 ± 0.93  | 1.53 ± 0.10        | 2.03 ± 0.17 | 1.13 ± 0.26        | 0.99 ± 0.28  | 0.52 ± 0.09        | 0.55 ± 0.05  |

| class      | acyl chain       | $m/z$        | gastrocnemius                     |                 |                                   |                 | soleus                            |                 |                                   |                 |
|------------|------------------|--------------|-----------------------------------|-----------------|-----------------------------------|-----------------|-----------------------------------|-----------------|-----------------------------------|-----------------|
|            |                  |              | C                                 | CX              | D                                 | DX              | C                                 | CX              | D                                 | DX              |
|            | 18:1/16:0        | 747.5        | $6.07 \pm 0.87$                   | $6.64 \pm 0.88$ | $4.02 \pm 0.44$                   | $6.82 \pm 1.15$ | $3.14 \pm 0.43$                   | $2.03 \pm 0.29$ | $1.31 \pm 0.27$                   | $1.93 \pm 0.36$ |
|            | 18:2/18:2        | 769.6        | $0.44 \pm 0.06$                   | $0.64 \pm 0.14$ | $0.30 \pm 0.02$                   | $0.31 \pm 0.03$ | $0.27 \pm 0.06$                   | $0.16 \pm 0.04$ | $0.10 \pm 0.01$                   | $0.09 \pm 0.01$ |
|            | <b>20:4/16:0</b> | <b>769.6</b> | $0.08 \pm 0.01$                   | $0.09 \pm 0.02$ | $0.03 \pm 0.00$                   | $0.03 \pm 0.00$ | <b><math>0.05 \pm 0.01</math></b> | $0.03 \pm 0.01$ | <b><math>0.02 \pm 0.00</math></b> | $0.01 \pm 0.00$ |
|            | 18:2/18:1        | 771.6        | $0.38 \pm 0.06$                   | $0.41 \pm 0.07$ | $0.42 \pm 0.03$                   | $0.40 \pm 0.05$ | $0.18 \pm 0.03$                   | $0.12 \pm 0.02$ | $0.13 \pm 0.03$                   | $0.11 \pm 0.02$ |
|            | 18:1/18:1        | 773.6        | $0.18 \pm 0.02$                   | $0.21 \pm 0.02$ | $0.22 \pm 0.03$                   | $0.17 \pm 0.03$ | $0.18 \pm 0.03$                   | $0.16 \pm 0.02$ | $0.15 \pm 0.03$                   | $0.18 \pm 0.01$ |
|            | <b>18:2/18:0</b> | <b>773.6</b> | $1.07 \pm 0.12$                   | $1.25 \pm 0.20$ | $0.43 \pm 0.06$                   | $0.70 \pm 0.10$ | <b><math>0.57 \pm 0.06</math></b> | $0.37 \pm 0.06$ | <b><math>0.15 \pm 0.03</math></b> | $0.20 \pm 0.03$ |
|            | 20:2/16:0        | 773.6        | $0.32 \pm 0.03$                   | $0.31 \pm 0.02$ | $0.41 \pm 0.03$                   | $0.35 \pm 0.03$ | $0.28 \pm 0.03$                   | $0.27 \pm 0.02$ | $0.24 \pm 0.03$                   | $0.21 \pm 0.01$ |
|            | 18:2/22:6        | 817.6        | $0.21 \pm 0.03$                   | $0.22 \pm 0.03$ | $0.17 \pm 0.01$                   | $0.14 \pm 0.02$ | $0.11 \pm 0.01$                   | $0.07 \pm 0.01$ | $0.06 \pm 0.01$                   | $0.04 \pm 0.00$ |
|            | 18:1/22:6        | 819.5        | N.Q.                              | N.Q.            | N.Q.                              | N.Q.            | N.Q.                              | N.Q.            | N.Q.                              | N.Q.            |
|            | <b>22:6/22:6</b> | <b>865.6</b> | <b><math>0.07 \pm 0.01</math></b> | $0.08 \pm 0.01$ | <b><math>0.02 \pm 0.00</math></b> | $0.02 \pm 0.00$ | <b><math>0.05 \pm 0.01</math></b> | $0.03 \pm 0.00$ | <b><math>0.01 \pm 0.00</math></b> | $0.01 \pm 0.00$ |
| <b>LPI</b> | 16:0             | 571.4        | $0.05 \pm 0.01$                   | $0.07 \pm 0.01$ | $0.14 \pm 0.02$                   | $0.18 \pm 0.03$ | $0.34 \pm 0.03$                   | $0.24 \pm 0.02$ | $0.70 \pm 0.14$                   | $0.50 \pm 0.09$ |
|            | <b>18:2</b>      | <b>595.4</b> | <b><math>0.06 \pm 0.01</math></b> | $0.07 \pm 0.01$ | <b><math>0.21 \pm 0.02</math></b> | $0.23 \pm 0.03$ | $0.35 \pm 0.03$                   | $0.22 \pm 0.02$ | $1.06 \pm 0.11$                   | $0.62 \pm 0.09$ |
|            | 18:1             | 597.5        | $0.05 \pm 0.01$                   | $0.06 \pm 0.01$ | $0.14 \pm 0.02$                   | $0.19 \pm 0.03$ | $0.37 \pm 0.05$                   | $0.22 \pm 0.02$ | $0.73 \pm 0.14$                   | $0.53 \pm 0.10$ |
|            | 18:0             | 599.3        | $0.40 \pm 0.06$                   | $0.42 \pm 0.06$ | $0.91 \pm 0.21$                   | $0.83 \pm 0.16$ | $2.01 \pm 0.31$                   | $1.05 \pm 0.19$ | $4.12 \pm 1.17$                   | $1.99 \pm 0.40$ |
|            | 20:4             | 619.5        | $0.41 \pm 0.04$                   | $0.39 \pm 0.05$ | $0.88 \pm 0.10$                   | $0.83 \pm 0.09$ | $1.94 \pm 0.19$                   | $1.00 \pm 0.09$ | $3.83 \pm 0.42$                   | $2.11 \pm 0.33$ |
|            | <b>20:3</b>      | <b>621.4</b> | <b><math>0.09 \pm 0.03</math></b> | $0.07 \pm 0.01$ | <b><math>0.40 \pm 0.05</math></b> | $0.42 \pm 0.05$ | <b><math>0.54 \pm 0.19</math></b> | $0.24 \pm 0.02$ | <b><math>1.94 \pm 0.26</math></b> | $1.13 \pm 0.16$ |
|            | 22:6             | 643.4        | $0.01 \pm 0.00$                   | $0.01 \pm 0.00$ | $0.02 \pm 0.00$                   | $0.02 \pm 0.00$ | $0.13 \pm 0.01$                   | $0.08 \pm 0.00$ | $0.16 \pm 0.01$                   | $0.11 \pm 0.01$ |
| <b>PI</b>  | 16:0/16:0        | 809.6        | $0.03 \pm 0.00$                   | $0.03 \pm 0.01$ | $0.03 \pm 0.00$                   | $0.04 \pm 0.01$ | $0.10 \pm 0.01$                   | $0.07 \pm 0.00$ | $0.10 \pm 0.01$                   | $0.08 \pm 0.01$ |
|            | 18:1/16:1        | 833.5        | $0.03 \pm 0.00$                   | $0.03 \pm 0.00$ | $0.04 \pm 0.00$                   | $0.03 \pm 0.00$ | $0.05 \pm 0.01$                   | $0.06 \pm 0.01$ | $0.05 \pm 0.01$                   | $0.07 \pm 0.02$ |
|            | 18:2/16:0        | 833.5        | $0.05 \pm 0.00$                   | $0.06 \pm 0.01$ | $0.04 \pm 0.00$                   | $0.05 \pm 0.00$ | $0.12 \pm 0.01$                   | $0.08 \pm 0.01$ | $0.11 \pm 0.01$                   | $0.08 \pm 0.01$ |
|            | 18:1/16:0        | 835.5        | $0.11 \pm 0.01$                   | $0.13 \pm 0.01$ | $0.11 \pm 0.01$                   | $0.14 \pm 0.02$ | $0.16 \pm 0.01$                   | $0.11 \pm 0.01$ | $0.13 \pm 0.01$                   | $0.12 \pm 0.01$ |
|            | 16:0/20:4        | 857.6        | $0.16 \pm 0.02$                   | $0.18 \pm 0.02$ | $0.14 \pm 0.01$                   | $0.15 \pm 0.01$ | $0.19 \pm 0.02$                   | $0.14 \pm 0.01$ | $0.15 \pm 0.01$                   | $0.12 \pm 0.01$ |
|            | 16:0/20:3        | 859.5        | $0.02 \pm 0.00$                   | $0.04 \pm 0.01$ | $0.03 \pm 0.01$                   | $0.04 \pm 0.00$ | $0.05 \pm 0.01$                   | $0.04 \pm 0.01$ | $0.05 \pm 0.01$                   | $0.06 \pm 0.01$ |
|            | 18:1/18:2        | 859.5        | $0.07 \pm 0.01$                   | $0.09 \pm 0.01$ | $0.06 \pm 0.00$                   | $0.06 \pm 0.00$ | $0.13 \pm 0.01$                   | $0.09 \pm 0.01$ | $0.11 \pm 0.01$                   | $0.09 \pm 0.01$ |

| class      | acyl chain       | $m/z$        | gastrocnemius      |             |                    |             | soleus             |             |                    |             |
|------------|------------------|--------------|--------------------|-------------|--------------------|-------------|--------------------|-------------|--------------------|-------------|
|            |                  |              | C                  | CX          | D                  | DX          | C                  | CX          | D                  | DX          |
|            | 18:0/18:2        | 861.6        | 0.17 ± 0.03        | 0.23 ± 0.02 | 0.23 ± 0.02        | 0.25 ± 0.03 | 0.20 ± 0.02        | 0.15 ± 0.01 | 0.19 ± 0.02        | 0.16 ± 0.02 |
|            | 18:1/18:1        | 861.6        | 0.08 ± 0.01        | 0.07 ± 0.02 | 0.06 ± 0.01        | 0.05 ± 0.01 | 0.07 ± 0.01        | 0.09 ± 0.02 | 0.08 ± 0.01        | 0.07 ± 0.01 |
|            | 18:0/18:1        | 863.5        | 0.05 ± 0.01        | 0.04 ± 0.01 | 0.05 ± 0.00        | 0.07 ± 0.01 | 0.12 ± 0.01        | 0.07 ± 0.00 | 0.11 ± 0.01        | 0.09 ± 0.01 |
|            | <b>18:2/20:4</b> | <b>881.5</b> | <b>0.02 ± 0.00</b> | 0.02 ± 0.00 | <b>0.01 ± 0.00</b> | 0.01 ± 0.00 | 0.10 ± 0.01        | 0.07 ± 0.00 | 0.09 ± 0.01        | 0.07 ± 0.01 |
|            | 16:0/22:6        | 881.6        | 0.04 ± 0.00        | 0.05 ± 0.01 | 0.03 ± 0.00        | 0.04 ± 0.00 | 0.11 ± 0.01        | 0.08 ± 0.00 | 0.10 ± 0.01        | 0.08 ± 0.01 |
|            | 16:0/22:5        | 883.5        | 0.04 ± 0.00        | 0.06 ± 0.01 | 0.05 ± 0.01        | 0.06 ± 0.01 | 0.06 ± 0.00        | 0.05 ± 0.01 | 0.05 ± 0.01        | 0.04 ± 0.00 |
|            | 18:0/20:5        | 883.5        | 0.08 ± 0.01        | 0.09 ± 0.02 | 0.07 ± 0.01        | 0.08 ± 0.02 | 0.05 ± 0.01        | 0.04 ± 0.01 | 0.05 ± 0.00        | 0.04 ± 0.00 |
|            | 18:1/20:4        | 883.5        | 0.31 ± 0.03        | 0.32 ± 0.04 | 0.18 ± 0.01        | 0.18 ± 0.02 | 0.30 ± 0.03        | 0.19 ± 0.02 | 0.16 ± 0.02        | 0.14 ± 0.01 |
|            | 18:0/20:4        | 885.6        | 5.67 ± 0.65        | 4.57 ± 0.46 | 2.98 ± 0.25        | 2.86 ± 0.44 | 4.14 ± 0.43        | 1.98 ± 0.23 | 1.39 ± 0.28        | 1.22 ± 0.22 |
|            | 18:0/20:3        | 887.5        | 0.36 ± 0.05        | 0.28 ± 0.05 | 0.55 ± 0.06        | 0.48 ± 0.09 | 0.38 ± 0.05        | 0.18 ± 0.03 | 0.34 ± 0.06        | 0.25 ± 0.04 |
|            | 18:0/20:2        | 889.5        | N.Q.               | N.Q.        | N.Q.               | N.Q.        | N.Q.               | N.Q.        | N.Q.               | N.Q.        |
|            | 18:1/22:6        | 907.5        | 0.04 ± 0.00        | 0.04 ± 0.01 | 0.02 ± 0.00        | 0.02 ± 0.00 | 0.11 ± 0.01        | 0.07 ± 0.00 | 0.09 ± 0.01        | 0.07 ± 0.01 |
|            | 18:0/22:6        | 909.6        | 0.55 ± 0.08        | 0.55 ± 0.06 | 0.38 ± 0.03        | 0.34 ± 0.05 | 0.47 ± 0.06        | 0.29 ± 0.03 | 0.24 ± 0.04        | 0.20 ± 0.02 |
|            | 18:0/22:5        | 911.5        | 0.24 ± 0.03        | 0.23 ± 0.03 | 0.21 ± 0.02        | 0.21 ± 0.04 | 0.25 ± 0.02        | 0.15 ± 0.02 | 0.18 ± 0.03        | 0.15 ± 0.02 |
|            | 18:0/22:4        | 913.6        | 0.09 ± 0.01        | 0.16 ± 0.03 | 0.06 ± 0.01        | 0.07 ± 0.02 | 0.16 ± 0.01        | 0.12 ± 0.01 | 0.11 ± 0.01        | 0.09 ± 0.01 |
| <b>LPS</b> | <b>18:1</b>      | <b>522.3</b> | <b>0.06 ± 0.01</b> | 0.10 ± 0.01 | <b>0.24 ± 0.04</b> | 0.37 ± 0.06 | <b>0.23 ± 0.03</b> | 0.16 ± 0.02 | <b>0.70 ± 0.16</b> | 0.60 ± 0.12 |
|            | 22:6             | 568.4        | 0.26 ± 0.02        | 0.29 ± 0.03 | 0.71 ± 0.08        | 0.75 ± 0.08 | 0.77 ± 0.07        | 0.47 ± 0.04 | 1.84 ± 0.25        | 1.19 ± 0.14 |
| <b>PS</b>  | 16:0/18:2        | 758.6        | 0.24 ± 0.03        | 0.36 ± 0.05 | 0.69 ± 0.07        | 0.56 ± 0.05 | 0.19 ± 0.03        | 0.18 ± 0.03 | 0.33 ± 0.07        | 0.22 ± 0.03 |
|            | 16:1/18:1        | 758.6        | 0.08 ± 0.02        | 0.09 ± 0.02 | 0.07 ± 0.01        | 0.08 ± 0.01 | 0.05 ± 0.01        | 0.07 ± 0.01 | 0.06 ± 0.01        | 0.05 ± 0.01 |
|            | 16:0/18:1        | 760.5        | 0.02 ± 0.00        | 0.03 ± 0.00 | 0.02 ± 0.01        | 0.03 ± 0.01 | 0.03 ± 0.00        | 0.02 ± 0.00 | 0.02 ± 0.00        | 0.02 ± 0.00 |
|            | 18:0/16:1        | 760.5        | 0.01 ± 0.00        | 0.01 ± 0.00 | 0.01 ± 0.01        | 0.01 ± 0.00 | 0.00 ± 0.00        | 0.00 ± 0.00 | 0.00 ± 0.00        | 0.00 ± 0.00 |
|            | 16:0/20:4        | 782.5        | N.Q.               | N.Q.        | N.Q.               | N.Q.        | N.Q.               | N.Q.        | N.Q.               | N.Q.        |
|            | 18:1/18:2        | 784.5        | 0.05 ± 0.01        | 0.12 ± 0.02 | 0.05 ± 0.01        | 0.05 ± 0.00 | 0.04 ± 0.00        | 0.06 ± 0.01 | 0.03 ± 0.00        | 0.03 ± 0.00 |
|            | 18:0/18:2        | 786.6        | 0.14 ± 0.02        | 0.10 ± 0.01 | 0.15 ± 0.02        | 0.12 ± 0.01 | 0.08 ± 0.02        | 0.07 ± 0.01 | 0.06 ± 0.01        | 0.05 ± 0.01 |



| class      | acyl chain        | $m/z$        | gastrocnemius      |              |                    |             | soleus             |             |                    |              |
|------------|-------------------|--------------|--------------------|--------------|--------------------|-------------|--------------------|-------------|--------------------|--------------|
|            |                   |              | C                  | CX           | D                  | DX          | C                  | CX          | D                  | DX           |
|            | 18:1/18:1         | 786.6        | 0.26 ± 0.03        | 0.46 ± 0.03  | 0.25 ± 0.04        | 0.36 ± 0.05 | 0.20 ± 0.02        | 0.18 ± 0.02 | 0.11 ± 0.02        | 0.16 ± 0.03  |
|            | 18:0/18:1         | 788.5        | 0.65 ± 0.09        | 0.92 ± 0.17  | 0.54 ± 0.19        | 0.85 ± 0.15 | 0.46 ± 0.09        | 0.39 ± 0.09 | 0.25 ± 0.07        | 0.36 ± 0.08  |
|            | <b>16:0/22:6</b>  | <b>806.5</b> | 0.21 ± 0.03        | 0.26 ± 0.04  | 0.09 ± 0.02        | 0.12 ± 0.01 | <b>0.17 ± 0.03</b> | 0.12 ± 0.02 | <b>0.05 ± 0.01</b> | 0.06 ± 0.01  |
|            | 18:1/20:4         | 808.5        | 0.06 ± 0.01        | 0.09 ± 0.01  | 0.05 ± 0.01        | 0.05 ± 0.00 | 0.06 ± 0.01        | 0.04 ± 0.01 | 0.03 ± 0.01        | 0.03 ± 0.00  |
|            | 16:0/22:5         | 808.5        | N.Q.               | N.Q.         | N.Q.               | N.Q.        | N.Q.               | N.Q.        | N.Q.               | N.Q.         |
|            | <b>18:0/20:4</b>  | <b>810.6</b> | 0.71 ± 0.08        | 0.79 ± 0.05  | 0.40 ± 0.06        | 0.38 ± 0.05 | <b>0.52 ± 0.06</b> | 0.35 ± 0.03 | <b>0.17 ± 0.03</b> | 0.16 ± 0.03  |
|            | 18:0/20:3         | 812.5        | 0.14 ± 0.02        | 0.14 ± 0.02  | 0.14 ± 0.02        | 0.13 ± 0.02 | 0.10 ± 0.01        | 0.07 ± 0.01 | 0.07 ± 0.01        | 0.06 ± 0.01  |
|            | 20:0/18:1         | 816.5        | 0.10 ± 0.02        | 0.27 ± 0.07  | 0.10 ± 0.03        | 0.11 ± 0.02 | N.Q.               | N.Q.        | N.Q.               | N.Q.         |
|            | <b>18:1/22:6</b>  | <b>832.6</b> | 0.17 ± 0.03        | 0.22 ± 0.04  | 0.08 ± 0.01        | 0.07 ± 0.01 | <b>0.13 ± 0.02</b> | 0.10 ± 0.02 | <b>0.04 ± 0.01</b> | 0.04 ± 0.00  |
|            | <b>18:0/22:6</b>  | <b>834.5</b> | 5.62 ± 0.49        | 5.06 ± 0.47  | 2.86 ± 0.36        | 2.73 ± 0.31 | <b>4.11 ± 0.38</b> | 2.18 ± 0.26 | <b>1.23 ± 0.22</b> | 1.17 ± 0.18  |
|            | 18:0/22:5         | 836.6        | 1.01 ± 0.11        | 0.96 ± 0.08  | 0.64 ± 0.10        | 0.64 ± 0.09 | 0.69 ± 0.07        | 0.43 ± 0.05 | 0.27 ± 0.06        | 0.29 ± 0.05  |
|            | 18:0/22:4         | 838.5        | 0.35 ± 0.05        | 0.40 ± 0.06  | 0.21 ± 0.02        | 0.19 ± 0.03 | 0.24 ± 0.03        | 0.19 ± 0.03 | 0.10 ± 0.01        | 0.09 ± 0.02  |
|            | 22:1/18:1         | 842.6        | 0.05 ± 0.01        | 0.18 ± 0.04  | 0.05 ± 0.02        | 0.06 ± 0.02 | 0.04 ± 0.01        | 0.07 ± 0.02 | 0.03 ± 0.01        | 0.03 ± 0.01  |
|            | 22:0/18:1         | 844.6        | 0.13 ± 0.04        | 0.48 ± 0.16  | 0.19 ± 0.08        | 0.22 ± 0.10 | N.Q.               | N.Q.        | N.Q.               | N.Q.         |
|            | 24:1/18:1         | 870.5        | N.Q.               | N.Q.         | N.Q.               | N.Q.        | N.Q.               | N.Q.        | N.Q.               | N.Q.         |
|            | 24:0/18:1         | 872.5        | N.Q.               | N.Q.         | N.Q.               | N.Q.        | N.Q.               | N.Q.        | N.Q.               | N.Q.         |
| <b>LPA</b> | 16:0              | 409.4        | 0.02 ± 0.00        | 0.02 ± 0.01  | 0.05 ± 0.01        | 0.04 ± 0.01 | 0.07 ± 0.01        | 0.04 ± 0.00 | 0.10 ± 0.01        | 0.08 ± 0.01  |
|            | <b>18:2</b>       | <b>433.5</b> | <b>0.01 ± 0.00</b> | 0.01 ± 0.00  | <b>0.03 ± 0.01</b> | 0.02 ± 0.00 | 0.05 ± 0.00        | 0.05 ± 0.00 | 0.09 ± 0.01        | 0.06 ± 0.01  |
|            | 18:0              | 437.3        | 0.01 ± 0.00        | 0.01 ± 0.00  | 0.03 ± 0.01        | 0.01 ± 0.00 | 0.04 ± 0.01        | 0.02 ± 0.00 | 0.05 ± 0.01        | 0.03 ± 0.00  |
| <b>PA</b>  | <b>16:0/18:2</b>  | <b>671.5</b> | <b>0.03 ± 0.00</b> | 0.03 ± 0.00  | <b>0.11 ± 0.03</b> | 0.06 ± 0.02 | 0.04 ± 0.00        | 0.02 ± 0.00 | 0.01 ± 0.00        | 0.01 ± 0.00  |
|            | 16:1/18:1         | 671.5        | 0.02 ± 0.00        | 0.02 ± 0.00  | 0.02 ± 0.00        | 0.03 ± 0.01 | 0.03 ± 0.00        | 0.03 ± 0.00 | 0.02 ± 0.00        | 0.04 ± 0.01  |
| <b>SM</b>  | d18:1/16:0        | 703.5        | 0.54 ± 0.07        | 0.59 ± 0.04  | 0.58 ± 0.07        | 0.58 ± 0.07 | 1.51 ± 0.08        | 1.59 ± 0.16 | 4.09 ± 0.34        | 1.14 ± 0.10* |
|            | d18:1/18:0        | 731.6        | 12.01 ± 1.37       | 10.89 ± 0.98 | 6.62 ± 0.80        | 6.94 ± 0.78 | 2.46 ± 0.13        | 2.05 ± 0.20 | 5.86 ± 0.82        | 2.13 ± 0.14  |
|            | <b>d18:1/20:0</b> | <b>759.5</b> | <b>3.21 ± 0.38</b> | 3.26 ± 0.31  | <b>1.01 ± 0.12</b> | 1.32 ± 0.21 | 2.54 ± 0.12        | 2.27 ± 0.20 | 7.57 ± 0.49        | 3.27 ± 0.22  |

| class     | acyl chain        | $m/z$        | gastrocnemius      |             |                    |             | soleus             |              |                    |              |
|-----------|-------------------|--------------|--------------------|-------------|--------------------|-------------|--------------------|--------------|--------------------|--------------|
|           |                   |              | C                  | CX          | D                  | DX          | C                  | CX           | D                  | DX           |
| Cer       | d18:1/22:1        | 785.5        | 0.80 ± 0.08        | 0.91 ± 0.07 | 0.27 ± 0.03        | 0.47 ± 0.09 | 0.27 ± 0.03        | 0.23 ± 0.02  | 0.27 ± 0.03        | 0.14 ± 0.02  |
|           | <b>d18:1/22:0</b> | <b>787.6</b> | <b>4.65 ± 0.68</b> | 5.16 ± 0.92 | <b>1.21 ± 0.17</b> | 1.75 ± 0.16 | 1.52 ± 0.19        | 1.25 ± 0.18  | 1.20 ± 0.16        | 0.52 ± 0.06  |
|           | <b>d18:1/23:0</b> | <b>801.6</b> | <b>2.57 ± 0.42</b> | 2.13 ± 0.29 | <b>0.42 ± 0.06</b> | 0.62 ± 0.11 | 0.90 ± 0.12        | 0.56 ± 0.07  | 0.44 ± 0.06        | 0.18 ± 0.03  |
|           | <b>d18:1/24:2</b> | <b>811.6</b> | <b>2.21 ± 0.36</b> | 2.29 ± 0.56 | <b>0.50 ± 0.05</b> | 0.74 ± 0.04 | 0.72 ± 0.13        | 0.56 ± 0.10  | 0.48 ± 0.05        | 0.22 ± 0.01  |
|           | d18:1/24:1        | 813.5        | 4.57 ± 0.67        | 3.65 ± 0.77 | 2.92 ± 0.47        | 4.39 ± 0.43 | 13.09 ± 1.42       | 10.7 ± 1.30  | 27.24 ± 3.76       | 12.90 ± 1.43 |
|           | <b>d18:1/24:0</b> | <b>815.6</b> | <b>6.90 ± 0.86</b> | 7.20 ± 0.93 | <b>1.44 ± 0.24</b> | 2.42 ± 0.26 | 27.04 ± 3.85       | 20.95 ± 2.07 | 16.51 ± 2.27       | 8.01 ± 0.96  |
|           | <b>d18:1/16:0</b> | <b>538.6</b> | 0.02 ± 0.00        | 0.02 ± 0.00 | 0.02 ± 0.00        | 0.03 ± 0.00 | <b>0.01 ± 0.00</b> | 0.01 ± 0.00  | <b>0.03 ± 0.00</b> | 0.01 ± 0.00* |
|           | <b>d18:0/18:1</b> | <b>564.5</b> | 0.00 ± 0.00        | 0.00 ± 0.00 | 0.00 ± 0.00        | 0.00 ± 0.00 | <b>0.01 ± 0.00</b> | 0.01 ± 0.00  | <b>0.02 ± 0.00</b> | 0.01 ± 0.00* |
|           | d18:1/18:0        | 566.5        | 0.52 ± 0.04        | 0.55 ± 0.05 | 0.38 ± 0.04        | 0.41 ± 0.04 | 0.10 ± 0.01        | 0.09 ± 0.01  | 0.22 ± 0.02        | 0.07 ± 0.01* |
|           | d18:1/20:0        | 594.8        | N.Q.               | N.Q.        | N.Q.               | N.Q.        | N.Q.               | N.Q.         | N.Q.               | N.Q.         |
| MHC       | d18:1/22:0        | 622.5        | 0.09 ± 0.02        | 0.11 ± 0.01 | 0.03 ± 0.00        | 0.04 ± 0.00 | 0.02 ± 0.00        | 0.02 ± 0.00  | 0.03 ± 0.00        | 0.01 ± 0.00* |
|           | d18:1/24:2        | 646.5        | 0.10 ± 0.01        | 0.12 ± 0.01 | 0.04 ± 0.00        | 0.06 ± 0.01 | 0.02 ± 0.00        | 0.02 ± 0.00  | 0.04 ± 0.00        | 0.01 ± 0.00  |
|           | <b>d18:1/24:1</b> | <b>648.6</b> | <b>0.61 ± 0.09</b> | 0.74 ± 0.06 | <b>0.20 ± 0.02</b> | 0.32 ± 0.03 | 0.11 ± 0.01        | 0.11 ± 0.01  | 0.13 ± 0.01        | 0.05 ± 0.00  |
|           | <b>d18:1/24:0</b> | <b>650.6</b> | <b>0.98 ± 0.13</b> | 1.12 ± 0.12 | <b>0.22 ± 0.02</b> | 0.44 ± 0.07 | 0.18 ± 0.02        | 0.16 ± 0.01  | 0.13 ± 0.01        | 0.07 ± 0.01  |
|           | d18:1/24:1        | 810.6        | 0.18 ± 0.03        | 0.27 ± 0.02 | 0.10 ± 0.01        | 0.16 ± 0.01 | 0.07 ± 0.00        | 0.09 ± 0.01  | 0.13 ± 0.01        | 0.07 ± 0.01  |
| DAG       | d18:1/24:0        | 812.5        | N.Q.               | N.Q.        | N.Q.               | N.Q.        | N.Q.               | N.Q.         | N.Q.               | N.Q.         |
|           | 14:1,16:1         | 554.5        | N.Q.               | N.Q.        | N.Q.               | N.Q.        | N.Q.               | N.Q.         | N.Q.               | N.Q.         |
|           | 14:0,16:1         | 556.5        | 0.00 ± 0.00        | 0.00 ± 0.00 | 0.00 ± 0.00        | 0.00 ± 0.00 | 0.01 ± 0.00        | 0.01 ± 0.00  | 0.01 ± 0.01        | 0.01 ± 0.00  |
|           | <b>14:1,16:0</b>  | <b>556.5</b> | <b>0.00 ± 0.00</b> | 0.00 ± 0.00 | <b>0.00 ± 0.00</b> | 0.00 ± 0.00 | <b>0.01 ± 0.00</b> | 0.01 ± 0.00  | <b>0.04 ± 0.01</b> | 0.02 ± 0.00  |
|           | <b>14:0,16:0</b>  | <b>558.5</b> | 0.00 ± 0.00        | 0.00 ± 0.00 | 0.01 ± 0.00        | 0.00 ± 0.00 | <b>0.01 ± 0.00</b> | 0.01 ± 0.00  | <b>0.02 ± 0.00</b> | 0.01 ± 0.00  |
|           | 14:0,18:2         | 582.6        | 0.00 ± 0.00        | 0.00 ± 0.00 | 0.01 ± 0.00        | 0.01 ± 0.00 | 0.03 ± 0.00        | 0.04 ± 0.01  | 0.05 ± 0.00        | 0.04 ± 0.01  |
|           | 16:1,16:1         | 582.6        | 0.00 ± 0.00        | 0.00 ± 0.00 | 0.01 ± 0.00        | 0.01 ± 0.00 | 0.11 ± 0.02        | 0.11 ± 0.01  | 0.12 ± 0.02        | 0.10 ± 0.01  |
|           | 14:0,18:1         | 584.5        | 0.00 ± 0.00        | 0.01 ± 0.00 | 0.01 ± 0.00        | 0.00 ± 0.00 | 0.03 ± 0.01        | 0.04 ± 0.00  | 0.05 ± 0.01        | 0.04 ± 0.00  |
| 16:0,16:1 | 584.5             | 0.00 ± 0.00  | 0.00 ± 0.00        | 0.01 ± 0.00 | 0.00 ± 0.00        | 0.05 ± 0.01 | 0.04 ± 0.00        | 0.07 ± 0.01  | 0.05 ± 0.00        |              |

| class | acyl chain       | $m/z$        | gastrocnemius      |             |                    |             | soleus             |             |                    |              |
|-------|------------------|--------------|--------------------|-------------|--------------------|-------------|--------------------|-------------|--------------------|--------------|
|       |                  |              | C                  | CX          | D                  | DX          | C                  | CX          | D                  | DX           |
|       | 16:0,16:0        | 586.6        | 0.22 ± 0.02        | 0.27 ± 0.02 | 0.22 ± 0.02        | 0.15 ± 0.01 | 0.05 ± 0.01        | 0.04 ± 0.00 | 0.09 ± 0.01        | 0.11 ± 0.02  |
|       | <b>16:1,18:3</b> | <b>606.5</b> | <b>0.00 ± 0.00</b> | 0.00 ± 0.00 | <b>0.00 ± 0.00</b> | 0.00 ± 0.00 | <b>0.00 ± 0.00</b> | 0.00 ± 0.00 | <b>0.01 ± 0.00</b> | 0.00 ± 0.00* |
|       | <b>16:0,18:3</b> | <b>608.7</b> | <b>0.01 ± 0.00</b> | 0.01 ± 0.00 | <b>0.07 ± 0.01</b> | 0.05 ± 0.01 | <b>0.03 ± 0.00</b> | 0.04 ± 0.00 | <b>0.35 ± 0.06</b> | 0.16 ± 0.02  |
|       | 16:1,18:2        | 608.7        | 0.00 ± 0.00        | 0.00 ± 0.00 | 0.01 ± 0.00        | 0.00 ± 0.00 | 0.02 ± 0.00        | 0.03 ± 0.01 | 0.03 ± 0.00        | 0.04 ± 0.01  |
|       | <b>16:0,18:2</b> | <b>610.5</b> | <b>0.27 ± 0.03</b> | 0.32 ± 0.04 | <b>1.06 ± 0.12</b> | 0.68 ± 0.08 | <b>0.32 ± 0.05</b> | 0.41 ± 0.05 | <b>2.07 ± 0.31</b> | 0.81 ± 0.09  |
|       | <b>16:0,18:1</b> | <b>612.4</b> | <b>0.44 ± 0.03</b> | 0.62 ± 0.05 | <b>1.35 ± 0.17</b> | 1.15 ± 0.07 | <b>0.57 ± 0.06</b> | 0.76 ± 0.06 | <b>2.74 ± 0.42</b> | 1.37 ± 0.09  |
|       | 16:0,18:0        | 614.5        | 0.08 ± 0.01        | 0.09 ± 0.01 | 0.07 ± 0.01        | 0.05 ± 0.00 | 0.12 ± 0.02        | 0.11 ± 0.01 | 0.15 ± 0.02        | 0.06 ± 0.01  |
|       | <b>18:2,18:3</b> | <b>632.5</b> | <b>0.00 ± 0.00</b> | 0.00 ± 0.00 | <b>0.00 ± 0.00</b> | 0.00 ± 0.00 | <b>0.00 ± 0.00</b> | 0.00 ± 0.00 | <b>0.02 ± 0.00</b> | 0.01 ± 0.00  |
|       | 18:1,18:3        | 634.5        | 0.02 ± 0.00        | 0.03 ± 0.01 | 0.03 ± 0.00        | 0.04 ± 0.01 | 0.20 ± 0.02        | 0.22 ± 0.03 | 0.23 ± 0.02        | 0.24 ± 0.03  |
|       | <b>18:2,18:2</b> | <b>634.5</b> | <b>0.06 ± 0.01</b> | 0.06 ± 0.01 | <b>0.18 ± 0.02</b> | 0.12 ± 0.02 | <b>0.36 ± 0.06</b> | 0.40 ± 0.05 | <b>2.33 ± 0.38</b> | 0.93 ± 0.12  |
|       | <b>18:1,18:2</b> | <b>636.6</b> | <b>0.38 ± 0.04</b> | 0.35 ± 0.05 | <b>1.37 ± 0.18</b> | 0.91 ± 0.12 | <b>1.10 ± 0.12</b> | 1.21 ± 0.12 | <b>5.56 ± 0.88</b> | 3.52 ± 0.34  |
|       | 18:0,18:2        | 638.5        | 0.30 ± 0.04        | 0.42 ± 0.04 | 0.34 ± 0.04        | 0.28 ± 0.02 | 0.05 ± 0.01        | 0.05 ± 0.00 | 0.04 ± 0.01        | 0.04 ± 0.00  |
|       | <b>18:1,18:1</b> | <b>638.5</b> | <b>1.00 ± 0.08</b> | 1.11 ± 0.11 | <b>3.12 ± 0.41</b> | 3.19 ± 0.25 | 0.18 ± 0.02        | 0.17 ± 0.01 | 0.37 ± 0.06        | 0.21 ± 0.02  |
|       | 18:0,18:1        | 640.6        | 0.14 ± 0.02        | 0.16 ± 0.01 | 0.21 ± 0.02        | 0.18 ± 0.01 | 0.03 ± 0.00        | 0.02 ± 0.00 | 0.02 ± 0.00        | 0.01 ± 0.00  |
|       | <b>18:0,18:0</b> | <b>642.5</b> | 0.02 ± 0.00        | 0.02 ± 0.00 | 0.01 ± 0.00        | 0.01 ± 0.00 | <b>0.00 ± 0.00</b> | 0.00 ± 0.00 | <b>0.01 ± 0.00</b> | 0.00 ± 0.00* |
|       | <b>16:1,22:6</b> | <b>656.6</b> | <b>0.00 ± 0.00</b> | 0.00 ± 0.00 | <b>0.00 ± 0.00</b> | 0.00 ± 0.00 | 0.03 ± 0.00        | 0.03 ± 0.00 | 0.09 ± 0.02        | 0.02 ± 0.00* |
|       | 16:0,22:6        | 658.5        | 0.01 ± 0.00        | 0.01 ± 0.00 | 0.02 ± 0.00        | 0.01 ± 0.00 | 0.04 ± 0.01        | 0.03 ± 0.00 | 0.09 ± 0.02        | 0.02 ± 0.00* |
|       | 18:1,20:4        | 660.6        | 0.01 ± 0.00        | 0.01 ± 0.00 | 0.02 ± 0.00        | 0.01 ± 0.00 | 0.08 ± 0.01        | 0.09 ± 0.01 | 0.12 ± 0.01        | 0.05 ± 0.00  |
|       | <b>18:0,20:4</b> | <b>662.5</b> | 0.15 ± 0.02        | 0.19 ± 0.02 | 0.05 ± 0.01        | 0.04 ± 0.00 | <b>0.02 ± 0.00</b> | 0.02 ± 0.00 | <b>0.10 ± 0.01</b> | 0.04 ± 0.00  |
|       | 18:1,20:2        | 664.5        | 0.01 ± 0.00        | 0.00 ± 0.00 | 0.01 ± 0.00        | 0.00 ± 0.00 | 0.03 ± 0.00        | 0.03 ± 0.00 | 0.03 ± 0.01        | 0.02 ± 0.00  |
|       | 18:2,20:1        | 664.5        | 0.03 ± 0.00        | 0.03 ± 0.00 | 0.01 ± 0.00        | 0.01 ± 0.00 | 0.02 ± 0.00        | 0.02 ± 0.00 | 0.02 ± 0.00        | 0.01 ± 0.00  |
|       | 18:0,20:2        | 666.6        | 0.02 ± 0.00        | 0.02 ± 0.00 | 0.02 ± 0.00        | 0.01 ± 0.00 | 0.01 ± 0.00        | 0.01 ± 0.00 | 0.01 ± 0.00        | 0.01 ± 0.00  |
|       | 18:1,20:1        | 666.6        | 0.03 ± 0.00        | 0.03 ± 0.00 | 0.02 ± 0.00        | 0.01 ± 0.00 | 0.01 ± 0.00        | 0.01 ± 0.00 | 0.02 ± 0.00        | 0.00 ± 0.00* |
|       | 18:1,20:0        | 668.5        | 0.01 ± 0.00        | 0.00 ± 0.00 | 0.00 ± 0.00        | 0.00 ± 0.00 | 0.02 ± 0.00        | 0.02 ± 0.00 | 0.05 ± 0.01        | 0.01 ± 0.00* |

| class      | acyl chain       | $m/z$        | gastrocnemius      |             |                    |              | soleus             |              |                     |              |
|------------|------------------|--------------|--------------------|-------------|--------------------|--------------|--------------------|--------------|---------------------|--------------|
|            |                  |              | C                  | CX          | D                  | DX           | C                  | CX           | D                   | DX           |
|            | 18:2,22:6        | 682.5        | 0.00 ± 0.00        | 0.00 ± 0.00 | 0.00 ± 0.00        | 0.00 ± 0.00* | 0.03 ± 0.01        | 0.03 ± 0.00  | 0.08 ± 0.02         | 0.03 ± 0.00* |
|            | 18:1,22:6        | 684.5        | 0.00 ± 0.00        | 0.00 ± 0.00 | 0.01 ± 0.00        | 0.00 ± 0.00  | 0.03 ± 0.00        | 0.03 ± 0.00  | 0.05 ± 0.01         | 0.02 ± 0.00  |
|            | 18:1,22:5        | 686.6        | 0.01 ± 0.00        | 0.01 ± 0.00 | 0.02 ± 0.00        | 0.01 ± 0.00  | 0.04 ± 0.00        | 0.04 ± 0.00  | 0.03 ± 0.00         | 0.01 ± 0.00  |
|            | <b>18:1,22:4</b> | <b>688.5</b> | 0.01 ± 0.00        | 0.01 ± 0.00 | 0.01 ± 0.00        | 0.01 ± 0.00  | <b>0.00 ± 0.00</b> | 0.00 ± 0.00  | <b>0.02 ± 0.00</b>  | 0.01 ± 0.00  |
|            | <b>18:0,22:4</b> | <b>690.6</b> | 0.01 ± 0.00        | 0.01 ± 0.00 | 0.00 ± 0.00        | 0.00 ± 0.00  | <b>0.00 ± 0.00</b> | 0.00 ± 0.00  | <b>0.01 ± 0.00</b>  | 0.00 ± 0.00  |
| <b>TAG</b> | <b>42:4</b>      | <b>732.7</b> | 0.01 ± 0.00        | 0.01 ± 0.00 | 0.00 ± 0.00        | 0.01 ± 0.00  | <b>0.01 ± 0.00</b> | 0.00 ± 0.00* | <b>0.10 ± 0.02</b>  | 0.04 ± 0.01  |
|            | <b>42:3</b>      | <b>734.7</b> | 0.00 ± 0.00        | 0.00 ± 0.00 | 0.01 ± 0.00        | 0.02 ± 0.00  | <b>0.01 ± 0.00</b> | 0.00 ± 0.00  | <b>0.04 ± 0.00</b>  | 0.03 ± 0.00  |
|            | <b>42:2</b>      | <b>736.7</b> | <b>0.01 ± 0.00</b> | 0.01 ± 0.00 | <b>0.04 ± 0.01</b> | 0.09 ± 0.01  | <b>0.01 ± 0.00</b> | 0.00 ± 0.00* | <b>0.16 ± 0.01</b>  | 0.15 ± 0.01  |
|            | <b>42:1</b>      | <b>738.7</b> | 0.10 ± 0.01        | 0.14 ± 0.02 | 0.21 ± 0.04        | 0.41 ± 0.05  | <b>0.08 ± 0.01</b> | 0.03 ± 0.00  | <b>0.59 ± 0.09</b>  | 0.37 ± 0.04  |
|            | <b>42:0</b>      | <b>740.8</b> | 0.04 ± 0.00        | 0.06 ± 0.01 | 0.08 ± 0.02        | 0.12 ± 0.02  | <b>0.03 ± 0.00</b> | 0.02 ± 0.00  | <b>0.32 ± 0.09</b>  | 0.18 ± 0.01  |
|            | <b>44:4</b>      | <b>760.7</b> | <b>0.00 ± 0.00</b> | 0.00 ± 0.00 | <b>0.00 ± 0.00</b> | 0.01 ± 0.00  | <b>0.04 ± 0.00</b> | 0.02 ± 0.00  | <b>0.27 ± 0.05</b>  | 0.13 ± 0.01  |
|            | <b>44:3</b>      | <b>762.7</b> | <b>0.01 ± 0.00</b> | 0.01 ± 0.00 | <b>0.04 ± 0.01</b> | 0.08 ± 0.01  | 11.65 ± 1.03       | 6.18 ± 0.80  | 10.38 ± 1.50        | 5.38 ± 0.66  |
|            | <b>44:2</b>      | <b>764.7</b> | <b>0.05 ± 0.01</b> | 0.05 ± 0.01 | <b>0.21 ± 0.05</b> | 0.44 ± 0.05  | 3.71 ± 0.35        | 1.98 ± 0.36  | 2.34 ± 0.39         | 1.13 ± 0.18  |
|            | 44:1             | 766.7        | 0.13 ± 0.01        | 0.19 ± 0.02 | 0.33 ± 0.06        | 0.56 ± 0.06  | 0.71 ± 0.05        | 0.37 ± 0.03  | 1.11 ± 0.19         | 0.43 ± 0.05  |
|            | 44:0             | 768.6        | 0.05 ± 0.01        | 0.06 ± 0.01 | 0.05 ± 0.01        | 0.09 ± 0.01  | 0.57 ± 0.04        | 0.25 ± 0.02  | 0.90 ± 0.14         | 0.31 ± 0.04  |
|            | <b>46:5</b>      | <b>786.6</b> | 0.00 ± 0.00        | 0.00 ± 0.00 | 0.00 ± 0.00        | 0.00 ± 0.00  | <b>0.07 ± 0.01</b> | 0.04 ± 0.00  | <b>0.62 ± 0.12</b>  | 0.35 ± 0.04  |
|            | <b>46:4</b>      | <b>788.7</b> | 0.03 ± 0.00        | 0.03 ± 0.00 | 0.03 ± 0.01        | 0.05 ± 0.01  | <b>0.08 ± 0.00</b> | 0.05 ± 0.00  | <b>0.41 ± 0.07</b>  | 0.23 ± 0.02  |
|            | 46:3             | 790.8        | 0.09 ± 0.01        | 0.11 ± 0.01 | 0.27 ± 0.05        | 0.59 ± 0.08  | 0.06 ± 0.01        | 0.03 ± 0.00  | 0.08 ± 0.01         | 0.05 ± 0.01  |
|            | <b>46:2</b>      | <b>792.7</b> | <b>0.24 ± 0.02</b> | 0.28 ± 0.03 | <b>0.76 ± 0.14</b> | 1.65 ± 0.20  | <b>1.05 ± 0.08</b> | 0.70 ± 0.12  | <b>7.17 ± 1.36</b>  | 4.46 ± 0.47  |
|            | <b>46:1</b>      | <b>794.7</b> | 0.29 ± 0.02        | 0.40 ± 0.04 | 0.49 ± 0.09        | 1.05 ± 0.10  | <b>1.20 ± 0.07</b> | 0.69 ± 0.06  | <b>4.68 ± 0.83</b>  | 2.63 ± 0.26  |
|            | <b>46:0</b>      | <b>796.7</b> | 0.21 ± 0.05        | 0.21 ± 0.02 | 0.09 ± 0.02        | 0.18 ± 0.03  | <b>0.71 ± 0.06</b> | 0.37 ± 0.04  | <b>5.31 ± 0.97</b>  | 3.01 ± 0.36  |
|            | 48:5             | 814.7        | 0.01 ± 0.00        | 0.01 ± 0.00 | 0.01 ± 0.00        | 0.01 ± 0.00  | 0.01 ± 0.00        | 0.00 ± 0.00  | 0.01 ± 0.00         | 0.00 ± 0.00  |
|            | 48:4             | 816.8        | 0.23 ± 0.02        | 0.29 ± 0.03 | 0.17 ± 0.03        | 0.28 ± 0.04  | 0.07 ± 0.01        | 0.04 ± 0.00  | 0.15 ± 0.02         | 0.06 ± 0.01  |
|            | <b>48:3</b>      | <b>818.7</b> | 0.69 ± 0.04        | 0.78 ± 0.08 | 1.77 ± 0.31        | 3.83 ± 0.47  | <b>2.09 ± 0.13</b> | 1.20 ± 0.13  | <b>11.23 ± 2.07</b> | 5.74 ± 0.68  |

| class | acyl chain  | $m/z$        | gastrocnemius      |              |                    |              | soleus             |              |                    |              |
|-------|-------------|--------------|--------------------|--------------|--------------------|--------------|--------------------|--------------|--------------------|--------------|
|       |             |              | C                  | CX           | D                  | DX           | C                  | CX           | D                  | DX           |
|       | 48:2        | 820.7        | 1.06 ± 0.07        | 1.49 ± 0.29  | 2.36 ± 0.45        | 5.55 ± 0.54  | 6.57 ± 0.42        | 3.50 ± 0.32  | 13.44 ± 2.46       | 7.27 ± 0.92  |
|       | 48:1        | 822.8        | 1.42 ± 0.11        | 1.39 ± 0.14  | 1.56 ± 0.27        | 3.06 ± 0.32  | 5.96 ± 0.40        | 3.14 ± 0.22  | 10.17 ± 1.78       | 5.96 ± 0.72  |
|       | <b>48:0</b> | <b>824.8</b> | 1.00 ± 0.05        | 0.46 ± 0.03  | 0.31 ± 0.07        | 0.53 ± 0.10  | <b>0.81 ± 0.06</b> | 0.41 ± 0.05  | <b>4.82 ± 0.82</b> | 2.11 ± 0.25  |
|       | 50:6        | 840.8        | 0.01 ± 0.00        | 0.01 ± 0.00  | 0.01 ± 0.00        | 0.01 ± 0.00  | 0.96 ± 0.06        | 0.22 ± 0.01* | 0.97 ± 0.21        | 0.51 ± 0.10  |
|       | 50:5        | 842.7        | 0.06 ± 0.00        | 0.06 ± 0.01  | 0.13 ± 0.03        | 0.26 ± 0.04  | 0.02 ± 0.00        | 0.01 ± 0.00  | 0.03 ± 0.01        | 0.01 ± 0.00  |
|       | <b>50:4</b> | <b>844.7</b> | 0.79 ± 0.05        | 0.86 ± 0.10  | 1.56 ± 0.28        | 2.73 ± 0.34  | <b>0.07 ± 0.01</b> | 0.03 ± 0.00  | <b>0.38 ± 0.07</b> | 0.21 ± 0.03  |
|       | 50:3        | 846.7        | 2.10 ± 0.13        | 2.46 ± 0.26  | 3.73 ± 0.68        | 7.27 ± 0.80  | 1.13 ± 0.07        | 0.51 ± 0.04  | 0.64 ± 0.10        | 0.26 ± 0.05  |
|       | 50:2        | 848.7        | 6.55 ± 0.48        | 7.11 ± 0.57  | 4.47 ± 0.76        | 8.81 ± 1.04  | 15.32 ± 0.98       | 8.17 ± 0.74  | 31.34 ± 5.75       | 16.96 ± 2.14 |
|       | 50:1        | 850.7        | 5.90 ± 0.60        | 6.50 ± 0.52  | 3.34 ± 0.55        | 6.96 ± 0.81  | 13.91 ± 0.94       | 7.33 ± 0.51  | 23.73 ± 4.15       | 13.91 ± 1.68 |
|       | <b>50:0</b> | <b>852.7</b> | <b>1.14 ± 0.08</b> | 0.91 ± 0.06  | <b>0.19 ± 0.03</b> | 0.25 ± 0.05  | 2.64 ± 0.15        | 1.19 ± 0.08  | 1.48 ± 0.23        | 0.59 ± 0.13  |
|       | 52:7        | 866.8        | 0.01 ± 0.00        | 0.01 ± 0.00  | 0.01 ± 0.00        | 0.02 ± 0.00  | 0.03 ± 0.00        | 0.02 ± 0.00  | 0.09 ± 0.02        | 0.05 ± 0.00  |
|       | 52:6        | 868.7        | 0.13 ± 0.01        | 0.13 ± 0.02  | 0.13 ± 0.02        | 0.20 ± 0.03  | 0.32 ± 0.02        | 0.14 ± 0.02  | 0.87 ± 0.14        | 0.36 ± 0.05  |
|       | 52:5        | 870.7        | 2.11 ± 0.16        | 2.36 ± 0.29  | 1.22 ± 0.17        | 1.71 ± 0.23  | 5.12 ± 0.34        | 2.56 ± 0.29  | 8.54 ± 1.26        | 3.06 ± 0.38  |
|       | 52:4        | 872.7        | 2.10 ± 0.20        | 2.32 ± 0.23  | 1.43 ± 0.23        | 2.37 ± 0.24  | 4.91 ± 0.33        | 2.54 ± 0.23  | 10.00 ± 1.71       | 4.31 ± 0.49  |
|       | 52:3        | 874.8        | 8.90 ± 0.66        | 9.96 ± 0.86  | 6.04 ± 0.58        | 10.66 ± 1.00 | 21.43 ± 1.20       | 11.02 ± 0.90 | 40.07 ± 4.85       | 19.36 ± 2.05 |
|       | 52:2        | 876.7        | 11.83 ± 1.14       | 14.11 ± 1.38 | 6.15 ± 0.66        | 12.96 ± 0.96 | 28.53 ± 1.78       | 15.42 ± 1.39 | 42.56 ± 5.22       | 24.40 ± 2.12 |
|       | 52:1        | 878.7        | 3.44 ± 0.47        | 4.15 ± 0.57  | 7.00 ± 0.79        | 7.23 ± 0.85  | 8.43 ± 0.73        | 4.42 ± 0.56  | 8.43 ± 1.06        | 4.56 ± 0.59  |
|       | 52:0        | 880.8        | 0.43 ± 0.04        | 0.33 ± 0.02  | 0.31 ± 0.07        | 0.23 ± 0.05  | 1.02 ± 0.10        | 0.43 ± 0.02  | 0.88 ± 0.21        | 0.18 ± 0.04  |
|       | <b>54:7</b> | <b>894.7</b> | <b>0.11 ± 0.01</b> | 0.13 ± 0.01  | <b>0.68 ± 0.13</b> | 0.59 ± 0.07  | <b>0.28 ± 0.02</b> | 0.14 ± 0.01  | <b>0.84 ± 0.15</b> | 0.36 ± 0.04  |
|       | 54:6        | 896.7        | 4.30 ± 0.34        | 4.58 ± 0.67  | 4.86 ± 0.53        | 3.04 ± 0.32  | 10.71 ± 0.72       | 4.85 ± 0.59  | 11.89 ± 1.58       | 1.77 ± 0.18* |
|       | 54:5        | 898.7        | 7.44 ± 0.87        | 7.67 ± 0.89  | 7.27 ± 0.88        | 5.41 ± 0.57  | 17.95 ± 1.39       | 8.27 ± 0.88  | 17.63 ± 2.80       | 3.10 ± 0.34* |
|       | 54:4        | 900.6        | 9.03 ± 0.73        | 9.68 ± 0.90  | 13.36 ± 1.32       | 10.51 ± 0.95 | 22.11 ± 1.56       | 10.55 ± 0.90 | 15.79 ± 2.15       | 6.12 ± 0.66  |
|       | 54:3        | 902.7        | 10.83 ± 0.91       | 12.34 ± 1.18 | 26.71 ± 3.09       | 24.97 ± 2.32 | 26.56 ± 1.95       | 13.3 ± 1.16  | 31.95 ± 4.53       | 14.73 ± 1.46 |
|       | 54:2        | 904.7        | 4.70 ± 0.57        | 5.92 ± 0.89  | 8.41 ± 1.24        | 8.70 ± 1.15  | 0.02 ± 0.00        | 0.01 ± 0.00  | 0.05 ± 0.01        | 0.02 ± 0.00  |

| class | acyl chain  | m/z          | gastrocnemius      |             |                    |             | soleus             |              |                    |              |
|-------|-------------|--------------|--------------------|-------------|--------------------|-------------|--------------------|--------------|--------------------|--------------|
|       |             |              | C                  | CX          | D                  | DX          | C                  | CX           | D                  | DX           |
|       | 54:1        | 906.7        | 1.40 ± 0.18        | 1.95 ± 0.41 | 1.81 ± 0.30        | 1.72 ± 0.32 | 0.01 ± 0.00        | 0.00 ± 0.00* | 0.01 ± 0.00        | 0.00 ± 0.00* |
|       | 56:8        | 920.7        | N.Q.               | N.Q.        | N.Q.               | N.Q.        | N.Q.               | N.Q.         | N.Q.               | N.Q.         |
|       | <b>56:7</b> | <b>922.7</b> | <b>0.28 ± 0.02</b> | 0.34 ± 0.03 | <b>0.86 ± 0.16</b> | 0.71 ± 0.08 | 0.01 ± 0.00        | 0.01 ± 0.00  | 0.04 ± 0.01        | 0.01 ± 0.00  |
|       | <b>56:6</b> | <b>924.7</b> | <b>0.22 ± 0.01</b> | 0.23 ± 0.02 | <b>0.73 ± 0.11</b> | 0.51 ± 0.06 | <b>0.03 ± 0.00</b> | 0.01 ± 0.00  | <b>0.22 ± 0.05</b> | 0.13 ± 0.02  |
|       | 56:5        | 926.8        | 0.19 ± 0.01        | 0.20 ± 0.02 | 0.54 ± 0.07        | 0.38 ± 0.04 | 0.48 ± 0.04        | 0.22 ± 0.02  | 0.65 ± 0.10        | 0.24 ± 0.03  |
|       | 56:4        | 928.7        | 0.30 ± 0.03        | 0.34 ± 0.03 | 0.41 ± 0.06        | 0.35 ± 0.03 | 0.75 ± 0.06        | 0.37 ± 0.03  | 0.51 ± 0.08        | 0.21 ± 0.02  |
|       | 56:3        | 930.8        | 0.65 ± 0.07        | 0.87 ± 0.06 | 1.56 ± 0.17        | 1.32 ± 0.23 | 1.61 ± 0.14        | 0.92 ± 0.07  | 1.89 ± 0.22        | 0.80 ± 0.11  |
|       | 56:2        | 932.7        | 0.33 ± 0.04        | 0.53 ± 0.06 | 0.60 ± 0.08        | 0.51 ± 0.11 | 0.85 ± 0.09        | 0.53 ± 0.06  | 0.77 ± 0.12        | 0.32 ± 0.05  |
|       | 58:10       | 944.7        | 0.10 ± 0.01        | 0.11 ± 0.02 | 0.19 ± 0.03        | 0.09 ± 0.01 | 0.25 ± 0.02        | 0.12 ± 0.01  | 0.24 ± 0.02        | 0.06 ± 0.01  |
|       | 58:9        | 946.7        | 0.16 ± 0.01        | 0.19 ± 0.02 | 0.30 ± 0.04        | 0.17 ± 0.01 | 0.40 ± 0.03        | 0.20 ± 0.02  | 0.40 ± 0.05        | 0.11 ± 0.01  |
|       | 58:8        | 948.7        | 0.10 ± 0.01        | 0.12 ± 0.01 | 0.17 ± 0.04        | 0.12 ± 0.01 | 0.27 ± 0.02        | 0.14 ± 0.01  | 0.23 ± 0.04        | 0.07 ± 0.01  |
|       | 58:7        | 950.8        | 0.06 ± 0.00        | 0.06 ± 0.01 | 0.13 ± 0.02        | 0.10 ± 0.01 | 0.16 ± 0.01        | 0.07 ± 0.01  | 0.17 ± 0.02        | 0.06 ± 0.01  |
|       | 58:6        | 952.8        | 0.05 ± 0.00        | 0.05 ± 0.00 | 0.09 ± 0.02        | 0.08 ± 0.01 | 0.13 ± 0.01        | 0.06 ± 0.00  | 0.12 ± 0.02        | 0.05 ± 0.01  |
|       | 58:5        | 954.7        | 0.01 ± 0.00        | 0.01 ± 0.00 | 0.01 ± 0.00        | 0.01 ± 0.00 | 0.03 ± 0.00        | 0.01 ± 0.00  | 0.01 ± 0.00        | 0.01 ± 0.00  |
|       | 58:4        | 956.7        | 0.03 ± 0.00        | 0.04 ± 0.01 | 0.06 ± 0.01        | 0.06 ± 0.01 | 0.08 ± 0.01        | 0.04 ± 0.00  | 0.08 ± 0.01        | 0.03 ± 0.00  |
|       | 58:3        | 958.6        | 0.16 ± 0.01        | 0.17 ± 0.02 | 0.16 ± 0.03        | 0.18 ± 0.03 | 0.32 ± 0.02        | 0.20 ± 0.02  | 0.21 ± 0.03        | 0.11 ± 0.02  |
|       | 58:2        | 960.7        | 0.09 ± 0.01        | 0.16 ± 0.02 | 0.12 ± 0.03        | 0.14 ± 0.02 | 0.23 ± 0.03        | 0.17 ± 0.02  | 0.17 ± 0.03        | 0.09 ± 0.01  |
|       | 58:1        | 962.7        | 0.03 ± 0.01        | 0.07 ± 0.01 | 0.03 ± 0.01        | 0.08 ± 0.01 | 0.09 ± 0.01        | 0.09 ± 0.01  | 0.04 ± 0.01        | 0.05 ± 0.00  |
|       | 60:4        | 984.7        | 0.04 ± 0.00        | 0.06 ± 0.01 | 0.04 ± 0.01        | 0.05 ± 0.00 | 0.11 ± 0.01        | 0.07 ± 0.01  | 0.05 ± 0.01        | 0.03 ± 0.00  |
|       | 60:3        | 986.7        | 0.08 ± 0.01        | 0.16 ± 0.02 | 0.08 ± 0.02        | 0.10 ± 0.01 | 0.20 ± 0.03        | 0.17 ± 0.02  | 0.10 ± 0.02        | 0.06 ± 0.01  |
|       | 60:2        | 988.8        | 0.05 ± 0.01        | 0.11 ± 0.02 | 0.04 ± 0.01        | 0.08 ± 0.01 | 0.13 ± 0.02        | 0.14 ± 0.01  | 0.06 ± 0.01        | 0.04 ± 0.00  |

N.Q.: not quantifiable, <sup>a,b,c</sup>: refers to the molecular structure of each isomer in b).

- significant change (>3-fold, p-value<0.01) between groups C and CX or D and DX marked with asterisk(\*) in CX and DX column respectively.

## b) PC

| total chain length | acyl chains | <i>m/z</i> | total chain length | acyl chains | <i>m/z</i> | total chain length | acyl chains | <i>m/z</i> |
|--------------------|-------------|------------|--------------------|-------------|------------|--------------------|-------------|------------|
| 30:0               | 14:0/16:0   | 706.5      | 36:2               | 18:0/18:2   | 786.5      | 40:7               | 18:2/22:5   | 832.6      |
| 32:2               | 14:0/18:2   | 730.6      |                    | 18:1/18:1   |            |                    | 20:3/20:4   |            |
|                    | 16:1/16:1   |            | 36:1               | 16:0/20:1   | 788.5      |                    | 22:6/18:1   |            |
| 32:1               | 14:0/18:1   | 732.5      |                    | 18:0/18:1   |            | 40:6               | 22:6/18:0   | 834.5      |
|                    | 16:0/16:1   |            | 36:0               | 16:0/20:0   | 790.6      | 40:5               | 18:0/22:5   | 836.5      |
| 32:0               | 16:0/16:0   | 734.5      |                    | 18:0/18:0   |            |                    | 20:1/20:4   |            |
| 34:4               | 14:0/20:4   | 754.5      | 38:7               | 16:1/22:6   | 804.5      | 40:4               | 16:0/24:4   | 838.5      |
|                    | 16:2/18:2   |            |                    | 18:2/20:5   |            |                    | 18:0/22:4   |            |
|                    | 18:3/16:1   |            |                    | 18:3/20:4   |            |                    | 20:1/20:3   |            |
| 34:3               | 16:0/18:3   | 756.5      | 38:6 <sup>a</sup>  | 16:0/22:6   | 806.5      | 40:1               | 16:0/24:1   | 844.5      |
|                    | 16:1/18:2   |            | 38:6 <sup>b</sup>  | 18:2/20:4   | 806.6      |                    | 16:1/24:0   |            |
| 34:2               | 16:0/18:2   | 758.6      | 38:5               | 16:0/22:5   | 808.5      |                    | 22:0/18:1   |            |
| 34:1               | 16:0/18:1   | 760.5      |                    | 18:1/20:4   |            | 40:0               | 16:0/24:0   | 846.6      |
| 34:0               | 18:0/16:0   | 762.5      | 38:4               | 16:0/22:4   | 810.5      | 42:10              | 22:6/20:4   | 854.5      |
| 36:5 <sup>a</sup>  | 16:0/20:5   | 780.5      |                    | 18:0/20:4   |            | 42:1               | 24:0/18:1   | 872.5      |
| 36:5 <sup>b</sup>  | 16:1/20:4   | 780.6      | 38:3               | 18:0/20:3   | 812.5      |                    |             |            |
| 36:5 <sup>c</sup>  | 18:3/18:2   | 780.5      | 38:2               | 18:0/20:2   | 814.6      |                    |             |            |
| 36:4 <sup>a</sup>  | 16:0/20:4   | 782.5      |                    | 20:0/18:2   |            |                    |             |            |
| 36:4 <sup>b</sup>  | 18:2/18:2   | 782.5      |                    | 20:1/18:1   |            |                    |             |            |
| 36:3               | 16:0/20:3   | 784.5      | 40:8               | 18:2/22:6   | 830.5      |                    |             |            |
|                    | 18:1/18:2   |            |                    | 20:4/20:4   |            |                    |             |            |

## c) PE

| total chain length | acyl chains | <i>m/z</i> | total chain length | acyl chains | <i>m/z</i> | total chain length | acyl chains | <i>m/z</i> |
|--------------------|-------------|------------|--------------------|-------------|------------|--------------------|-------------|------------|
| 34:3               | 16:1/18:2   | 714.5      | 36:2               | 18:0/18:2   | 744.5      | 38:3               | 18:0/20:3   | 770.6      |
| 34:2               | 16:0/18:2   | 716.5      |                    | 18:1/18:1   |            | 38:2               | 18:0/20:2   | 772.5      |
|                    | 16:1/18:1   |            | 36:1               | 18:0/18:1   | 746.5      |                    | 18:1/20:1   |            |
| 34:1               | 16:0/18:1   | 718.5      |                    | 20:1/16:0   |            |                    | 20:0/18:2   |            |
|                    | 18:0/16:1   |            | 38:7               | 16:1/22:6   | 762.5      | 40:8               | 18:2/22:6   | 788.6      |
| 34:0               | 18:0/16:0   | 720.6      | 38:6 <sup>a</sup>  | 16:0/22:6   | 764.6      | 40:7               | 18:1/22:6   | 790.5      |
| 36:5               | 16:1/20:4   | 738.5      | 38:6 <sup>b</sup>  | 18:2/20:4   | 764.5      |                    | 22:5/18:2   |            |
| 36:4 <sup>a</sup>  | 16:0/20:4   | 740.5      | 38:5               | 16:0/22:5   | 766.5      | 40:6               | 22:6/18:0   | 792.6      |
| 36:4 <sup>b</sup>  | 18:2/18:2   | 740.5      |                    | 18:1/20:4   |            | 40:5               | 18:0/22:5   | 794.5      |
| 36:3               | 16:0/20:3   | 742.6      |                    | 20:5/18:0   |            | 40:4               | 18:0/22:4   | 796.6      |
|                    | 18:1/18:2   |            | 38:4               | 16:0/22:4   | 768.5      | 40:3               | 18:0/22:3   | 798.6      |
|                    |             |            |                    | 18:0/20:4   |            |                    |             |            |

## d) TAG

| total chain length | acyl chains      | m/z   | total chain length | acyl chains      | m/z   | total chain length | acyl chains      | m/z   |
|--------------------|------------------|-------|--------------------|------------------|-------|--------------------|------------------|-------|
| 42:4               | 12:1, 12:1, 18:2 | 732.7 | 48:2               | 12:0, 18:1, 18:1 | 820.7 | 54:1               | 16:0, 18:1, 20:0 | 906.7 |
|                    | 12:1, 14:1, 16:2 |       |                    | 14:0, 16:0, 18:2 |       |                    | 18:0, 18:0, 18:1 |       |
|                    | 12:1, 14:2, 16:1 |       |                    | 14:0, 16:1, 18:1 |       | 56:8               | 16:0, 18:2, 22:6 | 920.7 |
|                    | 14:1, 14:1, 14:2 |       |                    | 14:1, 16:0, 18:1 |       |                    | 16:0, 20:4, 20:4 |       |
| 42:3               | 12:0, 12:1, 18:2 | 734.7 |                    | 16:0, 16:1, 16:1 |       |                    | 18:1, 18:2, 20:5 |       |
|                    | 12:1, 12:1, 18:1 |       | 48:1               | 14:0, 16:0, 18:1 | 822.8 |                    | 18:2, 18:2, 20:4 |       |
|                    | 12:1, 14:1, 16:1 |       |                    | 14:0, 16:1, 18:0 |       | 56:7               | 16:0, 18:1, 22:6 | 922.7 |
|                    | 14:1, 14:1, 14:1 |       |                    | 16:0, 16:0, 16:1 |       |                    | 16:0, 18:2, 22:5 |       |
| 42:2               | 12:0, 12:0, 18:2 | 736.7 | 48:0               | 16:0, 16:0, 16:0 | 824.8 |                    | 16:0, 20:3, 20:4 |       |
|                    | 12:0, 14:1, 16:1 |       | 50:6               | 14:0, 16:1, 20:5 | 840.8 |                    | 18:1, 18:2, 20:4 |       |
|                    | 14:0, 14:1, 14:1 |       |                    | 14:0, 18:3, 18:3 |       |                    | 18:2, 18:2, 20:3 |       |
| 42:1               | 12:0, 12:0, 18:1 | 738.7 |                    | 14:1, 16:0, 20:5 |       | 56:6               | 16:0, 18:1, 22:5 | 924.7 |
|                    | 12:0, 14:0, 16:1 |       |                    | 14:1, 16:1, 20:4 |       |                    | 16:0, 18:2, 22:4 |       |
|                    | 12:0, 14:1, 16:0 |       |                    | 14:2, 16:0, 20:4 |       |                    | 16:0, 20:3, 20:3 |       |
|                    | 14:0, 14:0, 14:1 |       |                    | 16:0, 16:3, 18:3 |       |                    | 18:1, 18:1, 20:4 |       |
| 42:0               | 12:0, 14:0, 16:0 | 740.8 |                    | 16:1, 16:3, 18:2 |       |                    | 18:1, 18:2, 20:3 |       |
|                    | 14:0, 14:0, 14:0 |       | 50:5               | 14:0, 18:2, 18:3 | 842.7 | 56:5               | 16:0, 18:1, 22:4 | 926.8 |
| 44:4               | 12:1, 14:1, 18:2 | 760.7 |                    | 14:1, 18:2, 18:2 |       |                    | 16:0, 20:2, 20:3 |       |
|                    | 12:1, 16:1, 16:2 |       |                    | 16:1, 16:1, 18:3 |       |                    | 18:0, 18:2, 20:3 |       |
|                    | 14:1, 14:1, 16:2 |       |                    | 16:1, 16:2, 18:2 |       |                    | 18:1, 18:1, 20:3 |       |
| 44:3               | 12:0, 14:1, 18:2 | 762.7 | 50:4               | 16:0, 16:1, 18:3 | 844.7 |                    | 18:1, 18:2, 20:2 |       |
|                    | 12:1, 14:1, 18:1 |       |                    | 16:0, 16:2, 18:2 |       |                    | 18:2, 18:2, 20:1 |       |
|                    | 12:1, 16:1, 16:1 |       |                    | 16:1, 16:1, 18:2 |       | 56:4               | 16:0, 20:2, 20:2 | 928.7 |
|                    | 14:1, 14:1, 16:1 |       |                    | 16:1, 16:2, 18:1 |       |                    | 18:1, 18:1, 20:2 |       |
| 44:2               | 12:0, 14:0, 18:2 | 764.7 | 50:3               | 16:0, 16:0, 18:3 | 846.7 |                    | 18:1, 18:2, 20:1 |       |
|                    | 12:0, 14:1, 18:1 |       |                    | 16:0, 16:1, 18:2 |       | 56:3               | 16:0, 20:1, 20:2 | 930.8 |
|                    | 12:0, 16:1, 16:1 |       |                    | 16:1, 16:1, 18:1 |       |                    | 18:0, 18:1, 20:2 |       |
|                    | 14:0, 14:1, 16:1 |       | 50:2               | 16:0, 16:0, 18:2 | 848.7 |                    | 18:0, 18:2, 20:1 |       |
|                    | 14:1, 14:1, 16:0 |       |                    | 16:0, 16:1, 18:1 |       |                    | 18:1, 18:1, 20:1 |       |
| 44:1               | 12:0, 14:0, 18:1 | 766.7 | 50:1               | 16:0, 16:0, 18:1 | 850.7 |                    | 18:1, 18:2, 20:0 |       |
|                    | 12:0, 16:0, 16:1 |       | 50:0               | 16:0, 16:0, 18:0 | 852.7 | 56:2               | 16:0, 20:1, 20:1 | 932.7 |
|                    | 14:0, 14:0, 16:1 |       | 52:7               | 14:0, 16:1, 22:6 | 866.8 |                    | 16:1, 18:1, 22:0 |       |
|                    | 14:0, 14:1, 16:0 |       |                    | 14:0, 18:2, 20:5 |       |                    | 18:0, 18:1, 20:1 |       |
| 44:0               | 12:0, 16:0, 16:0 | 768.6 |                    | 14:1, 16:0, 22:6 |       |                    | 18:1, 18:1, 20:0 |       |
|                    | 14:0, 14:0, 16:0 |       |                    | 14:1, 18:1, 20:5 |       | 58:10              | 18:2, 18:2, 22:6 | 944.7 |
| 46:5               | 12:0, 14:1, 20:4 | 786.6 |                    | 14:1, 18:2, 20:4 |       |                    | 18:2, 20:4, 20:4 |       |
|                    | 12:1, 16:2, 18:2 |       |                    | 16:0, 16:2, 20:5 |       | 58:9               | 18:1, 18:2, 22:6 | 946.7 |
|                    | 14:1, 16:2, 16:2 |       |                    | 16:1, 16:1, 20:5 |       |                    | 18:1, 20:4, 20:4 |       |
| 46:4               | 12:0, 16:1, 18:3 | 788.7 |                    | 16:1, 16:2, 20:4 |       |                    | 18:2, 18:2, 22:5 |       |
|                    | 12:1, 16:1, 18:2 |       | 52:6               | 14:0, 18:2, 20:4 | 868.7 | 58:8               | 16:0, 18:2, 24:6 | 948.7 |
|                    | 14:1, 14:1, 18:2 |       |                    | 16:1, 16:1, 20:4 |       |                    | 18:1, 18:1, 22:6 |       |
| 46:3               | 12:0, 16:1, 18:2 | 790.8 |                    | 16:1, 18:2, 18:3 |       |                    | 18:1, 18:2, 22:5 |       |
|                    | 12:1, 16:0, 18:2 |       | 52:5               | 16:0, 16:0, 20:5 | 870.7 | 58:7               | 18:0, 18:1, 22:6 | 950.8 |



| total chain length | acyl chains      | <i>m/z</i> | total chain length | acyl chains      | <i>m/z</i> | total chain length | acyl chains      | <i>m/z</i> |
|--------------------|------------------|------------|--------------------|------------------|------------|--------------------|------------------|------------|
|                    | 12:1, 16:1, 18:1 |            |                    | 16:0, 16:1, 20:4 |            |                    | 18:1, 18:1, 22:5 |            |
|                    | 14:0, 14:1, 18:2 |            |                    | 16:0, 18:2, 18:3 |            | 58:6               | 18:0, 18:1, 22:5 | 952.8      |
|                    | 14:1, 14:1, 18:1 |            |                    | 16:1, 18:1, 18:3 |            |                    | 18:0, 18:2, 22:4 |            |
| 46:2               | 14:1, 16:1, 16:1 |            | 52:4               | 16:0, 16:0, 20:4 | 872.7      |                    | 18:1, 18:1, 22:4 |            |
|                    | 12:0, 16:0, 18:2 | 792.7      |                    | 16:0, 18:1, 18:3 |            | 58:5               | 18:0, 18:1, 22:4 | 954.7      |
|                    | 12:0, 16:1, 18:1 |            |                    | 16:1, 18:1, 18:2 |            |                    | 18:0, 18:2, 22:3 |            |
|                    | 14:0, 14:0, 18:2 |            | 52:3               | 16:0, 18:1, 18:2 | 874.8      |                    | 18:0, 20:1, 20:4 |            |
|                    | 14:0, 14:1, 18:1 |            |                    | 16:1, 18:1, 18:1 |            |                    | 18:1, 18:1, 22:3 |            |
|                    | 14:0, 16:1, 16:1 |            | 52:2               | 16:0, 18:1, 18:1 | 876.7      |                    | 18:1, 20:1, 20:3 |            |
| 46:1               | 14:1, 16:0, 16:1 |            | 52:1               | 16:0, 18:0, 18:1 | 878.7      | 58:4               | 18:1, 18:1, 22:2 | 956.7      |
|                    | 12:0, 16:0, 18:1 | 794.7      | 52:0               | 16:0, 18:0, 18:0 | 880.8      |                    | 18:1, 18:2, 22:1 |            |
|                    | 14:0, 14:0, 18:1 |            | 54:7               | 16:1, 16:1, 22:5 | 894.7      |                    | 18:1, 20:1, 20:2 |            |
|                    | 14:0, 16:0, 16:1 |            |                    | 16:1, 18:1, 20:5 |            |                    | 18:2, 20:1, 20:1 |            |
| 46:0               | 14:1, 16:0, 16:0 | 796.7      |                    | 16:1, 18:2, 20:4 |            | 58:3               | 16:0, 18:2, 24:1 | 958.6      |
| 48:5               | 14:0, 16:0, 16:0 | 814.7      |                    | 18:1, 18:2, 18:4 |            |                    | 18:0, 18:2, 22:1 |            |
|                    | 12:0, 18:2, 18:3 |            |                    | 18:1, 18:3, 18:3 |            |                    | 18:1, 18:1, 22:1 |            |
|                    | 12:1, 18:2, 18:2 |            | 54:6               | 16:0, 16:0, 22:6 | 896.7      |                    | 18:1, 18:2, 22:0 |            |
|                    | 14:1, 16:1, 18:3 |            |                    | 16:0, 18:2, 20:4 |            |                    | 18:1, 20:1, 20:1 |            |
|                    | 14:2, 16:1, 18:2 |            |                    | 18:1, 18:2, 18:3 |            | 58:2               | 16:0, 18:1, 24:1 | 960.7      |
| 48:4               | 12:0, 18:2, 18:2 | 816.8      |                    | 18:2, 18:2, 18:2 |            |                    | 16:0, 20:1, 22:1 |            |
|                    | 12:1, 18:1, 18:2 |            | 54:5               | 16:0, 18:1, 20:4 | 898.7      |                    | 18:1, 18:1, 22:0 |            |
|                    | 14:0, 16:2, 18:2 |            |                    | 16:0, 18:2, 20:3 |            | 58:1               | 16:0, 18:0, 24:1 | 962.7      |
|                    | 14:1, 16:1, 18:2 |            |                    | 18:0, 18:2, 18:3 |            |                    | 18:0, 18:1, 22:0 |            |
|                    | 14:1, 16:2, 18:1 |            |                    | 18:1, 18:1, 18:3 |            | 60:4               | 18:1, 18:1, 24:2 | 984.7      |
|                    | 16:1, 16:1, 16:2 |            |                    | 18:1, 18:2, 18:2 |            |                    | 18:1, 18:2, 24:1 |            |
| 48:3               | 12:0, 18:1, 18:2 | 818.7      | 54:4               | 16:0, 18:1, 20:3 | 900.6      |                    | 18:2, 20:1, 22:1 |            |
|                    | 14:0, 16:1, 18:2 |            |                    | 18:0, 18:1, 18:3 |            | 60:3               | 18:1, 18:1, 24:1 | 986.7      |
|                    | 14:1, 16:0, 18:2 |            |                    | 18:0, 18:2, 18:2 |            |                    | 18:1, 18:2, 24:0 |            |
|                    | 14:1, 16:1, 18:1 |            |                    | 18:1, 18:1, 18:2 |            |                    | 18:1, 20:1, 22:1 |            |
|                    | 16:1, 16:1, 16:1 |            | 54:3               | 18:0, 18:1, 18:2 | 902.7      | 60:2               | 18:0, 18:1, 24:1 | 988.8      |
|                    |                  |            |                    | 18:1, 18:1, 18:1 |            |                    | 18:0, 18:2, 24:0 |            |
|                    |                  |            | 54:2               | 16:0, 18:1, 20:1 | 904.7      |                    | 18:1, 18:1, 24:0 |            |
|                    |                  |            |                    | 18:0, 18:0, 18:2 |            |                    |                  |            |
|                    |                  |            |                    | 18:0, 18:1, 18:1 |            |                    |                  |            |

Table S3. Lipid species stimulated by diabetes (at least D/C>3-fold with p-value<0.01 in the gastrocnemius or soleus) expressed with the relative peak area of the lipid species from C (n=14), D (n = 9), DX (n = 12), and CX groups (n = 15) (number of “abundance in class” represents the percentage of peak area of each species among its corresponding head group species).

| class | acyl chain | m/z   | gastrocnemius      |             |             |                      |            | soleus             |             |             |                      |             |
|-------|------------|-------|--------------------|-------------|-------------|----------------------|------------|--------------------|-------------|-------------|----------------------|-------------|
|       |            |       | D/C                | DX/C        | CX/C        | DX/D                 | % in class | D/C                | DX/C        | CX/C        | DX/D                 | % in class  |
| LPC   | 18:3       | 518.5 | <b>3.20 ± 0.34</b> | 4.64 ± 0.50 | 1.14 ± 0.13 | 1.45 ± 0.15          | 0.01       | 2.90 ± 0.27        | 1.03 ± 0.10 | 0.74 ± 0.07 | 0.35 ± 0.04          | 0.02        |
|       | 16:1       | 494.5 | <b>6.18 ± 0.59</b> | 8.69 ± 0.79 | 1.17 ± 0.10 | 1.41 ± 0.15          | 0.02       | <b>5.52 ± 0.68</b> | 3.06 ± 0.29 | 0.89 ± 0.10 | 0.55 ± 0.06          | 0.05        |
|       | 18:2       | 520.5 | <b>4.67 ± 0.58</b> | 5.40 ± 0.58 | 1.18 ± 0.13 | 1.16 ± 0.14          | 0.50       | <b>3.91 ± 0.39</b> | 1.80 ± 0.16 | 0.92 ± 0.09 | 0.46 ± 0.05          | 1.69        |
|       | 20:3       | 546.5 | <b>4.62 ± 0.43</b> | 5.70 ± 0.54 | 0.92 ± 0.09 | 1.23 ± 0.12          | 0.06       | <b>8.45 ± 1.16</b> | 3.47 ± 0.44 | 0.93 ± 0.11 | <b>0.41 ± 0.05**</b> | 0.10        |
|       | 16:0       | 496.5 | 2.38 ± 0.25        | 2.09 ± 0.20 | 1.21 ± 0.09 | 0.88 ± 0.10          | 0.89       | <b>4.80 ± 0.54</b> | 2.47 ± 0.25 | 0.99 ± 0.10 | 0.52 ± 0.06**        | 1.56        |
|       | 18:0       | 524.5 | 1.34 ± 0.16        | 1.39 ± 0.17 | 1.53 ± 0.16 | 1.04 ± 0.14          | 0.63       | <b>4.38 ± 0.39</b> | 2.19 ± 0.18 | 0.93 ± 0.08 | <b>0.50 ± 0.04*</b>  | 1.67        |
|       | 20:4       | 544.5 | 2.07 ± 0.24        | 2.38 ± 0.24 | 0.90 ± 0.09 | 1.15 ± 0.15          | 0.60       | <b>3.58 ± 0.49</b> | 1.64 ± 0.21 | 0.89 ± 0.11 | <b>0.46 ± 0.06**</b> | 0.92        |
|       | 22:6       | 568.5 | 1.79 ± 0.20        | 1.81 ± 0.20 | 1.06 ± 0.15 | 1.01 ± 0.11          | 0.36       | <b>4.12 ± 0.52</b> | 1.60 ± 0.18 | 1.28 ± 0.12 | <b>0.39 ± 0.05**</b> | 0.62        |
|       | 22:5       | 570.5 | 2.81 ± 0.27        | 2.92 ± 0.27 | 1.14 ± 0.12 | 1.04 ± 0.09          | 0.11       | <b>3.62 ± 0.40</b> | 1.61 ± 0.18 | 1.03 ± 0.11 | <b>0.45 ± 0.04**</b> | 0.19        |
| PC    | 38:2       | 814.5 | <b>0.22 ± 0.04</b> | 0.63 ± 0.11 | 1.37 ± 0.25 | <b>2.87 ± 0.45**</b> | 1.22       | 2.00 ± 0.49        | 5.66 ± 1.25 | 5.72 ± 1.19 | 2.83 ± 0.48          | 0.18        |
|       | 40:8       | 830.5 | <b>0.26 ± 0.04</b> | 0.40 ± 0.0  | 1.37 ± 0.17 | 1.53 ± 0.25*         | 1.79       | 0.42 ± 0.06        | 1.08 ± 0.15 | 2.01 ± 0.20 | 2.59 ± 0.41          | <u>3.99</u> |
|       | 34:0       | 762.5 | <b>0.26 ± 0.04</b> | 0.55 ± 0.07 | 1.19 ± 0.15 | <b>2.12 ± 0.34**</b> | 1.42       | <b>0.27 ± 0.03</b> | 0.72 ± 0.06 | 1.62 ± 0.17 | <b>2.65 ± 0.31**</b> | 1.16        |
|       | 36:0       | 790.5 | <b>0.21 ± 0.05</b> | 0.64 ± 0.15 | 1.50 ± 0.44 | <b>2.99 ± 0.65**</b> | 0.13       | <b>0.26 ± 0.05</b> | 0.47 ± 0.08 | 1.99 ± 0.43 | 1.82 ± 0.29          | 0.63        |
|       | 30:0       | 706.5 | 0.98 ± 0.16        | 1.76 ± 0.23 | 1.11 ± 0.18 | 1.79 ± 0.31          | 0.08       | <b>0.30 ± 0.05</b> | 0.75 ± 0.10 | 2.23 ± 0.26 | <b>2.46 ± 0.39**</b> | 0.13        |
|       | 42:1       | 872.5 | 0.65 ± 0.20        | 1.00 ± 0.21 | 1.14 ± 0.28 | 1.52 ± 0.41          | 0.10       | <b>0.32 ± 0.08</b> | 1.49 ± 0.30 | 3.86 ± 0.92 | <b>4.64 ± 1.11**</b> | 0.23        |
| LPE   | 16:1       | 452.5 | <b>3.91 ± 0.36</b> | 4.57 ± 0.45 | 1.01 ± 0.11 | 1.17 ± 0.10          | 0.05       | 2.16 ± 0.31        | 1.60 ± 0.22 | 1.38 ± 0.19 | 0.74 ± 0.09          | 0.07        |
|       | 20:5       | 500.5 | <b>4.05 ± 0.67</b> | 3.49 ± 0.48 | 0.94 ± 0.16 | 0.86 ± 0.10          | 0.03       | <b>4.20 ± 0.46</b> | 1.25 ± 0.19 | 1.02 ± 0.14 | <b>0.30 ± 0.04**</b> | 0.07        |
|       | 22:5       | 528.5 | 1.34 ± 0.21        | 1.22 ± 0.19 | 0.68 ± 0.12 | 0.90 ± 0.12          | 1.76       | <b>3.35 ± 0.39</b> | 1.46 ± 0.19 | 0.56 ± 0.07 | <b>0.44 ± 0.05**</b> | 1.87        |
| PE    | 22:4       | 530.5 | 1.03 ± 0.14        | 0.98 ± 0.14 | 0.66 ± 0.10 | 0.96 ± 0.10          | 0.44       | <b>3.10 ± 0.43</b> | 2.08 ± 0.31 | 0.71 ± 0.11 | 0.67 ± 0.07          | 0.39        |
|       | 34:0       | 720.5 | <b>0.27 ± 0.05</b> | 0.61 ± 0.10 | 1.98 ± 0.35 | <b>2.29 ± 0.45**</b> | 0.19       | 0.95 ± 0.10        | 2.25 ± 0.28 | 2.56 ± 0.22 | 2.36 ± 0.32          | 0.20        |
|       | 40:3       | 798.5 | 0.35 ± 0.08        | 0.77 ± 0.15 | 2.10 ± 0.48 | 2.18 ± 0.46          | 0.15       | <b>3.38 ± 0.31</b> | 7.66 ± 1.27 | 7.70 ± 0.73 | <b>2.26 ± 0.37**</b> | 0.06        |
| LPG   | 14:0       | 455.5 | <b>3.44 ± 0.77</b> | 3.94 ± 0.77 | 1.07 ± 0.21 | 1.15 ± 0.22          | 0.07       | 1.84 ± 0.28        | 0.50 ± 0.09 | 0.70 ± 0.10 | 0.27 ± 0.05          | 0.21        |

| class | acyl chain | m/z   | gastrocnemius      |             |             |                      | soleus       |                    |             |             |                      |              |
|-------|------------|-------|--------------------|-------------|-------------|----------------------|--------------|--------------------|-------------|-------------|----------------------|--------------|
|       |            |       | D/C                | DX/C        | CX/C        | DX/D                 | % in class   | D/C                | DX/C        | CX/C        | DX/D                 | % in class   |
| PG    | 16:1       | 481.5 | <b>5.35 ± 0.91</b> | 7.37 ± 1.31 | 1.32 ± 0.23 | 1.38 ± 0.23          | 0.11         | <b>5.66 ± 0.70</b> | 2.33 ± 0.31 | 1.13 ± 0.14 | <b>0.41 ± 0.05**</b> | 0.35         |
|       | 22:6/22:6  | 865.5 | <b>0.23 ± 0.03</b> | 0.34 ± 0.07 | 1.20 ± 0.17 | 1.49 ± 0.26          | 0.55         | <b>0.29 ± 0.04</b> | 0.28 ± 0.04 | 0.61 ± 0.12 | 0.97 ± 0.12          | 0.29         |
|       | 16:0/16:0  | 721.5 | 0.47 ± 0.09        | 0.74 ± 0.14 | 0.87 ± 0.17 | 1.55 ± 0.32          | 2.82         | <b>0.29 ± 0.06</b> | 0.41 ± 0.09 | 0.50 ± 0.10 | 1.42 ± 0.34          | 1.26         |
|       | 20:4/16:0  | 769.5 | 0.35 ± 0.06        | 0.40 ± 0.07 | 1.11 ± 0.31 | 1.15 ± 0.15          | 0.62         | <b>0.30 ± 0.06</b> | 0.27 ± 0.05 | 0.55 ± 0.15 | 0.88 ± 0.09          | 0.35         |
|       | 18:2/18:0  | 773.5 | 0.40 ± 0.08        | 0.65 ± 0.12 | 1.17 ± 0.23 | 1.64 ± 0.34          | <u>8.52</u>  | <b>0.26 ± 0.06</b> | 0.35 ± 0.07 | 0.65 ± 0.13 | 1.35 ± 0.35          | 3.63         |
| LPI   | 18:2       | 595.5 | <b>3.62 ± 0.55</b> | 3.86 ± 0.60 | 1.14 ± 0.20 | 1.07 ± 0.18          | 0.64         | 2.98 ± 0.43        | 1.75 ± 0.30 | 0.62 ± 0.07 | 0.59 ± 0.10          | 2.73         |
|       | 20:3       | 621.5 | <b>4.41 ± 1.67</b> | 4.60 ± 1.74 | 0.81 ± 0.30 | 1.04 ± 0.19          | 0.98         | <b>3.56 ± 1.33</b> | 2.07 ± 0.78 | 0.44 ± 0.16 | 0.58 ± 0.12          | <u>4.18</u>  |
| PI    | 18:2/20:4  | 881.5 | <b>0.29 ± 0.04</b> | 0.29 ± 0.05 | 1.02 ± 0.16 | 1.00 ± 0.15          | 0.23         | 0.89 ± 0.08        | 0.65 ± 0.07 | 0.65 ± 0.05 | 0.74 ± 0.08          | 0.78         |
| LPS   | 18:1       | 522.5 | <b>3.78 ± 0.80</b> | 5.81 ± 1.15 | 1.61 ± 0.23 | 1.54 ± 0.36          | 0.62         | <b>3.04 ± 0.79</b> | 2.58 ± 0.62 | 0.67 ± 0.12 | 0.85 ± 0.26          | 2.87         |
| PS    | 16:0/22:6  | 806.5 | 0.44 ± 0.11        | 0.54 ± 0.09 | 1.23 ± 0.27 | 1.22 ± 0.26          | 2.07         | <b>0.30 ± 0.06</b> | 0.33 ± 0.07 | 0.72 ± 0.17 | 1.12 ± 0.18          | 2.07         |
|       | 18:0/20:4  | 810.5 | 0.56 ± 0.10        | 0.53 ± 0.09 | 1.11 ± 0.14 | 0.95 ± 0.19          | <u>6.93</u>  | <b>0.33 ± 0.07</b> | 0.31 ± 0.07 | 0.67 ± 0.10 | 0.94 ± 0.25          | <u>6.41</u>  |
|       | 18:1/22:6  | 832.5 | 0.45 ± 0.10        | 0.43 ± 0.08 | 1.28 ± 0.32 | 0.94 ± 0.18          | 1.64         | <b>0.32 ± 0.07</b> | 0.29 ± 0.06 | 0.78 ± 0.20 | 0.92 ± 0.15          | 1.57         |
|       | 18:0/22:6  | 834.5 | 0.51 ± 0.08        | 0.49 ± 0.07 | 0.90 ± 0.11 | 0.95 ± 0.16          | <u>54.49</u> | <b>0.30 ± 0.06</b> | 0.28 ± 0.05 | 0.53 ± 0.08 | 0.95 ± 0.23          | <u>50.83</u> |
| LPA   | 18:2       | 433.5 | <b>4.23 ± 1.40</b> | 2.66 ± 0.70 | 1.36 ± 0.47 | 0.63 ± 0.17          | 7.54         | 1.64 ± 0.17        | 1.20 ± 0.13 | 0.95 ± 0.08 | 0.73 ± 0.08          | <u>23.66</u> |
| PA    | 16:0/18:2  | 671.5 | <b>3.56 ± 0.94</b> | 2.00 ± 0.50 | 0.99 ± 0.13 | 0.56 ± 0.20          | <u>38.30</u> | 0.35 ± 0.07        | 0.33 ± 0.07 | 0.67 ± 0.09 | 0.92 ± 0.23          | 15.75        |
| SM    | d18:1/20:0 | 759.5 | <b>0.31 ± 0.05</b> | 0.41 ± 0.08 | 1.02 ± 0.16 | 1.31 ± 0.25          | 8.56         | 2.98 ± 0.24        | 1.29 ± 0.11 | 0.89 ± 0.09 | 0.43 ± 0.04          | 5.07         |
|       | d18:1/22:0 | 787.5 | <b>0.26 ± 0.05</b> | 0.38 ± 0.06 | 1.11 ± 0.26 | 1.44 ± 0.24*         | <u>12.42</u> | 0.79 ± 0.14        | 0.34 ± 0.06 | 0.82 ± 0.16 | 0.43 ± 0.07          | 3.03         |
|       | d18:1/23:0 | 801.5 | <b>0.16 ± 0.04</b> | 0.24 ± 0.06 | 0.83 ± 0.18 | 1.50 ± 0.34*         | 6.86         | 0.49 ± 0.09        | 0.20 ± 0.04 | 0.62 ± 0.11 | 0.41 ± 0.08          | 1.79         |
|       | d18:1/24:2 | 811.5 | <b>0.22 ± 0.04</b> | 0.34 ± 0.06 | 1.04 ± 0.30 | 1.50 ± 0.18*         | 5.91         | 0.67 ± 0.14        | 0.30 ± 0.06 | 0.77 ± 0.20 | 0.45 ± 0.05          | 1.44         |
|       | d18:1/24:0 | 815.5 | <b>0.21 ± 0.04</b> | 0.35 ± 0.06 | 1.04 ± 0.19 | 1.68 ± 0.34*         | <u>18.42</u> | 0.61 ± 0.12        | 0.30 ± 0.06 | 0.77 ± 0.13 | 0.49 ± 0.09          | <u>54.02</u> |
| Cer   | d18:1/24:1 | 648.5 | <b>0.33 ± 0.06</b> | 0.52 ± 0.09 | 1.21 ± 0.21 | 1.56 ± 0.24          | <u>26.15</u> | 1.18 ± 0.20        | 0.48 ± 0.07 | 0.99 ± 0.15 | 0.41 ± 0.06          | <u>24.21</u> |
|       | d18:1/24:0 | 650.5 | <b>0.22 ± 0.04</b> | 0.45 ± 0.09 | 1.14 ± 0.20 | <b>2.04 ± 0.39**</b> | <u>42.31</u> | 0.74 ± 0.11        | 0.41 ± 0.07 | 0.92 ± 0.14 | 0.56 ± 0.08          | <u>40.55</u> |
|       | d18:1/16:0 | 538.5 | 1.31 ± 0.24        | 1.45 ± 0.24 | 1.03 ± 0.16 | 1.10 ± 0.22          | 0.78         | <b>3.43 ± 0.33</b> | 1.02 ± 0.08 | 0.92 ± 0.07 | <b>0.30 ± 0.03**</b> | 1.92         |
|       | d18:0/18:1 | 564.5 | 0.83 ± 0.13        | 0.79 ± 0.13 | 1.11 ± 0.18 | 0.95 ± 0.17          | 0.12         | <b>3.12 ± 0.14</b> | 0.90 ± 0.04 | 0.95 ± 0.05 | <b>0.29 ± 0.01**</b> | 1.30         |
| DAG   | 18:1,18:1  | 638.5 | <b>3.13 ± 0.48</b> | 3.20 ± 0.36 | 1.11 ± 0.15 | 1.02 ± 0.15          | <u>30.76</u> | 2.10 ± 0.39        | 1.17 ± 0.16 | 0.95 ± 0.13 | 0.55 ± 0.09          | <u>4.89</u>  |

| class | acyl chain | m/z   | gastrocnemius      |              |             |                     |              | soleus              |              |             |                      |              |  |
|-------|------------|-------|--------------------|--------------|-------------|---------------------|--------------|---------------------|--------------|-------------|----------------------|--------------|--|
|       |            |       | D/C                | DX/C         | CX/C        | DX/D                | % in class   | D/C                 | DX/C         | CX/C        | DX/D                 | % in class   |  |
|       | 16:1,22:6  | 656.5 | <b>5.87 ± 1.59</b> | 2.96 ± 0.76  | 0.97 ± 0.26 | 0.50 ± 0.14         | 0.00         | 2.92 ± 0.70         | 0.80 ± 0.15  | 0.90 ± 0.15 | 0.28 ± 0.07          | 0.85         |  |
|       | 14:1,16:0  | 556.5 | <b>7.04 ± 1.48</b> | 4.46 ± 0.86  | 1.02 ± 0.18 | 0.63 ± 0.14         | 0.01         | <b>3.92 ± 0.87</b>  | 1.79 ± 0.36  | 1.25 ± 0.21 | <b>0.46 ± 0.11**</b> | 0.28         |  |
|       | 16:1,18:3  | 606.5 | <b>8.84 ± 2.23</b> | 3.99 ± 0.76  | 0.99 ± 0.20 | 0.45 ± 0.12         | 0.01         | <b>7.97 ± 1.77</b>  | 2.27 ± 0.33  | 1.00 ± 0.11 | <b>0.28 ± 0.07**</b> | 0.03         |  |
|       | 16:0,18:3  | 608.5 | <b>7.20 ± 1.41</b> | 5.33 ± 1.08  | 1.14 ± 0.21 | 0.74 ± 0.16         | 0.29         | <b>12.4 ± 2.93</b>  | 5.80 ± 1.21  | 1.41 ± 0.28 | <b>0.47 ± 0.10*</b>  | 0.79         |  |
|       | 16:0,18:2  | 610.5 | <b>3.87 ± 0.61</b> | 2.50 ± 0.39  | 1.16 ± 0.20 | 0.65 ± 0.10         | <u>8.43</u>  | <b>6.50 ± 1.43</b>  | 2.53 ± 0.49  | 1.28 ± 0.26 | <b>0.39 ± 0.07**</b> | <u>8.83</u>  |  |
|       | 16:0,18:1  | 612.5 | <b>3.08 ± 0.45</b> | 2.62 ± 0.25  | 1.40 ± 0.16 | 0.85 ± 0.12         | <u>13.56</u> | <b>4.83 ± 0.89</b>  | 2.41 ± 0.29  | 1.34 ± 0.17 | <b>0.50 ± 0.08**</b> | <u>15.76</u> |  |
|       | 18:2,18:3  | 632.5 | <b>4.93 ± 1.14</b> | 3.24 ± 0.64  | 1.06 ± 0.21 | 0.66 ± 0.17         | 0.02         | <b>7.02 ± 1.63</b>  | 2.54 ± 0.52  | 1.10 ± 0.20 | <b>0.36 ± 0.09*</b>  | 0.06         |  |
|       | 18:2,18:2  | 634.5 | <b>3.05 ± 0.54</b> | 1.93 ± 0.36  | 0.98 ± 0.17 | 0.63 ± 0.12         | 1.85         | <b>6.54 ± 1.54</b>  | 2.62 ± 0.55  | 1.13 ± 0.24 | <b>0.40 ± 0.08**</b> | <u>9.90</u>  |  |
|       | 18:1,18:2  | 636.5 | <b>3.64 ± 0.62</b> | 2.40 ± 0.42  | 0.94 ± 0.16 | 0.66 ± 0.12         | <u>11.63</u> | <b>5.06 ± 0.96</b>  | 3.20 ± 0.46  | 1.10 ± 0.16 | 0.63 ± 0.12          | <u>30.50</u> |  |
|       | 14:0,16:0  | 558.5 | 2.39 ± 0.45        | 1.29 ± 0.23  | 1.12 ± 0.20 | 0.54 ± 0.10         | 0.11         | <b>3.87 ± 0.98</b>  | 1.72 ± 0.41  | 1.12 ± 0.24 | <b>0.44 ± 0.11**</b> | 0.17         |  |
|       | 18:0,18:0  | 642.5 | 0.62 ± 0.09        | 0.48 ± 0.15  | 1.03 ± 0.14 | 0.77 ± 0.23         | 0.59         | <b>5.52 ± 1.18</b>  | 1.71 ± 0.32  | 0.93 ± 0.13 | <b>0.31 ± 0.08**</b> | 0.03         |  |
|       | 18:0,20:4  | 662.5 | 0.36 ± 0.06        | 0.24 ± 0.03  | 1.27 ± 0.21 | 0.67 ± 0.10         | <u>4.61</u>  | <b>4.45 ± 0.82</b>  | 1.68 ± 0.28  | 1.12 ± 0.17 | <b>0.38 ± 0.07*</b>  | 0.61         |  |
|       | 18:1,22:4  | 688.5 | 1.05 ± 0.19        | 0.59 ± 0.08  | 0.88 ± 0.13 | 0.56 ± 0.10         | 0.27         | <b>9.61 ± 2.02</b>  | 3.73 ± 0.65  | 1.16 ± 0.16 | <b>0.39 ± 0.09**</b> | 0.05         |  |
|       | 18:0,22:4  | 690.5 | 0.35 ± 0.07        | 0.23 ± 0.03  | 1.18 ± 0.18 | 0.67 ± 0.12         | 0.33         | <b>3.55 ± 0.77</b>  | 1.20 ± 0.23  | 1.19 ± 0.21 | <b>0.34 ± 0.06**</b> | 0.09         |  |
| TAG   | 44:3       | 762.7 | <b>4.46 ± 1.18</b> | 8.14 ± 1.41  | 1.32 ± 0.33 | 1.82 ± 0.47         | 0.01         | 0.89 ± 0.15         | 0.46 ± 0.07  | 0.53 ± 0.08 | 0.52 ± 0.10          | <u>5.22</u>  |  |
|       | 44:2       | 764.7 | <b>4.53 ± 1.17</b> | 9.38 ± 1.65  | 1.09 ± 0.20 | <b>2.07 ± 0.51*</b> | 0.05         | 0.63 ± 0.12         | 0.31 ± 0.06  | 0.53 ± 0.11 | 0.48 ± 0.11          | <u>1.66</u>  |  |
|       | 50:0       | 852.7 | <b>0.17 ± 0.03</b> | 0.22 ± 0.05  | 0.80 ± 0.07 | 1.34 ± 0.33         | 1.24         | 0.56 ± 0.09         | 0.22 ± 0.05  | 0.45 ± 0.04 | 0.40 ± 0.10          | 1.18         |  |
|       | 56:7       | 922.7 | <b>3.03 ± 0.59</b> | 2.49 ± 0.34  | 1.20 ± 0.14 | 0.82 ± 0.18         | 0.31         | 2.97 ± 0.53         | 1.00 ± 0.12  | 0.44 ± 0.04 | 0.34 ± 0.06          | 0.01         |  |
|       | 42:2       | 736.7 | <b>5.25 ± 1.35</b> | 11.02 ± 2.02 | 1.05 ± 0.18 | <b>2.10 ± 0.50*</b> | 0.01         | <b>11.47 ± 2.07</b> | 11.08 ± 2.12 | 0.30 ± 0.06 | 0.97 ± 0.09          | 0.01         |  |
|       | 44:4       | 760.7 | <b>4.00 ± 1.19</b> | 6.76 ± 1.40  | 1.21 ± 0.23 | 1.69 ± 0.47         | 0.00         | <b>6.53 ± 1.21</b>  | 3.04 ± 0.40  | 0.60 ± 0.06 | <b>0.47 ± 0.10*</b>  | 0.02         |  |
|       | 46:2       | 792.7 | <b>3.19 ± 0.64</b> | 6.87 ± 1.03  | 1.16 ± 0.17 | <b>2.15 ± 0.46*</b> | 0.26         | <b>6.80 ± 1.39</b>  | 4.23 ± 0.56  | 0.66 ± 0.12 | 0.62 ± 0.14*         | 0.47         |  |
|       | 54:7       | 894.7 | <b>6.12 ± 1.22</b> | 5.30 ± 0.76  | 1.19 ± 0.16 | 0.87 ± 0.20         | 0.12         | <b>3.05 ± 0.59</b>  | 1.30 ± 0.16  | 0.52 ± 0.06 | <b>0.43 ± 0.09**</b> | 0.12         |  |
|       | 56:6       | 924.7 | <b>3.26 ± 0.50</b> | 2.29 ± 0.31  | 1.00 ± 0.10 | 0.70 ± 0.13         | 0.24         | <b>7.36 ± 1.63</b>  | 4.27 ± 0.63  | 0.49 ± 0.06 | 0.58 ± 0.14*         | 0.01         |  |
|       | 42:4       | 732.7 | 0.60 ± 0.14        | 1.01 ± 0.18  | 1.13 ± 0.18 | 1.68 ± 0.35         | 0.01         | <b>7.20 ± 1.84</b>  | 2.61 ± 0.66  | 0.20 ± 0.04 | <b>0.36 ± 0.11*</b>  | 0.01         |  |
|       | 42:3       | 734.7 | 2.31 ± 0.56        | 4.79 ± 0.87  | 1.15 ± 0.21 | 2.08 ± 0.47         | 0.00         | <b>6.30 ± 1.60</b>  | 5.33 ± 1.31  | 0.38 ± 0.09 | 0.85 ± 0.11          | 0.00         |  |
|       | 42:1       | 738.7 | 2.07 ± 0.45        | 4.09 ± 0.65  | 1.36 ± 0.22 | 1.98 ± 0.45         | 0.11         | <b>7.55 ± 1.59</b>  | 4.66 ± 0.89  | 0.42 ± 0.08 | 0.62 ± 0.12          | 0.04         |  |

| class | acyl chain | m/z   | gastrocnemius |             |             |             |            | soleus             |             |             |                      |            |
|-------|------------|-------|---------------|-------------|-------------|-------------|------------|--------------------|-------------|-------------|----------------------|------------|
|       |            |       | D/C           | DX/C        | CX/C        | DX/D        | % in class | D/C                | DX/C        | CX/C        | DX/D                 | % in class |
|       | 42:0       | 740.7 | 1.85 ± 0.43   | 2.64 ± 0.46 | 1.24 ± 0.20 | 1.43 ± 0.35 | 0.05       | <b>9.47 ± 2.99</b> | 5.29 ± 0.69 | 0.52 ± 0.07 | 0.56 ± 0.17          | 0.02       |
|       | 46:5       | 786.7 | 1.06 ± 0.26   | 1.36 ± 0.24 | 1.13 ± 0.17 | 1.28 ± 0.34 | 0.00       | <b>8.75 ± 1.84</b> | 5.00 ± 0.78 | 0.52 ± 0.08 | 0.57 ± 0.13**        | 0.03       |
|       | 46:4       | 788.7 | 1.31 ± 0.29   | 1.78 ± 0.27 | 1.15 ± 0.14 | 1.37 ± 0.32 | 0.03       | <b>4.90 ± 0.90</b> | 2.83 ± 0.33 | 0.64 ± 0.07 | 0.58 ± 0.12**        | 0.04       |
|       | 46:1       | 794.7 | 1.69 ± 0.32   | 3.59 ± 0.43 | 1.37 ± 0.16 | 2.13 ± 0.43 | 0.32       | <b>3.89 ± 0.73</b> | 2.19 ± 0.25 | 0.57 ± 0.06 | 0.56 ± 0.11**        | 0.54       |
|       | 46:0       | 796.7 | 0.42 ± 0.12   | 0.86 ± 0.23 | 0.96 ± 0.23 | 2.06 ± 0.54 | 0.23       | <b>7.49 ± 1.53</b> | 4.24 ± 0.64 | 0.52 ± 0.07 | 0.57 ± 0.12**        | 0.32       |
|       | 48:3       | 818.7 | 2.57 ± 0.48   | 5.55 ± 0.77 | 1.13 ± 0.14 | 2.16 ± 0.47 | 0.75       | <b>5.38 ± 1.05</b> | 2.75 ± 0.37 | 0.57 ± 0.07 | 0.51 ± 0.11**        | 0.94       |
|       | 48:0       | 824.7 | 0.31 ± 0.07   | 0.53 ± 0.10 | 0.46 ± 0.03 | 1.74 ± 0.50 | 1.09       | <b>5.96 ± 1.12</b> | 2.61 ± 0.37 | 0.51 ± 0.07 | <b>0.44 ± 0.09**</b> | 0.36       |
|       | 50:4       | 844.7 | 1.97 ± 0.38   | 3.46 ± 0.47 | 1.09 ± 0.15 | 1.76 ± 0.39 | 0.86       | <b>5.68 ± 1.18</b> | 3.07 ± 0.48 | 0.42 ± 0.06 | 0.54 ± 0.13*         | 0.03       |

- species marked as **bold** in D/C column represent significant change (>3-fold, p-value < 0.01 in D/C)

- species marked as **bold** in DX/D column represent significant change (>3-fold, p-value < 0.01 in D/C and >2-fold, p-value < 0.05 in DX/D)

- species written in underline denote high abundance in each class from group C

- \* p<0.05, \*\* p<0.01 : significant change between groups D and DX marked in DX/D column

Table S4. Training intensity of rats on a treadmill.

| Age<br>(weeks old) | Intensity<br>(m/min) | Time<br>(min) |
|--------------------|----------------------|---------------|
| 8                  | 10                   | 10            |
| 9                  | 12                   | 25            |
| 10                 | 11–12.5              | 35            |
| 11                 | 12.5–14.5            | 40            |
| 12                 | 14.5                 | 40            |
| 13                 | 14.5                 | 40            |
| 14                 | 14.5                 | 50            |

Table S5. SRM transitions for quantifying lipids species according to the class

| Class | Precursor ion                     | Product ion                                            | Collision energy (V) |
|-------|-----------------------------------|--------------------------------------------------------|----------------------|
| LPC   | [M+H] <sup>+</sup>                | <sup>a</sup> [Pcho+H] <sup>+</sup>                     | 40                   |
| PC    | [M+H] <sup>+</sup>                | <sup>a</sup> [Pcho+H] <sup>+</sup>                     | 40                   |
| LPE   | [M+H] <sup>+</sup>                | <sup>b</sup> [M+H-141] <sup>+</sup>                    | 20                   |
| PE    | [M+H] <sup>+</sup>                | <sup>b</sup> [M+H-141] <sup>+</sup>                    | 20                   |
| LPG   | [M-H] <sup>-</sup>                | [RCOO] <sup>-</sup>                                    | 35                   |
| PG    | [M-H] <sup>-</sup>                | [RCOO] <sup>-</sup>                                    | 35                   |
| LPI   | [M-H] <sup>-</sup>                | [RCOO] <sup>-</sup>                                    | 35                   |
| PI    | [M-H] <sup>-</sup>                | [RCOO] <sup>-</sup>                                    | 35                   |
| LPS   | [M-H] <sup>-</sup>                | [M-H-RCOOH] <sup>-</sup>                               | 35                   |
| PS    | [M-H] <sup>-</sup>                | [RCOO] <sup>-</sup>                                    | 35                   |
| LPA   | [M-H] <sup>-</sup>                | [M-H-RCOOH] <sup>-</sup>                               | 35                   |
| PA    | [M-H] <sup>-</sup>                | [RCOO] <sup>-</sup>                                    | 35                   |
| SM    | [M+H] <sup>+</sup>                | <sup>a</sup> [Pcho+H] <sup>+</sup>                     | 40                   |
| Cer   | [M+H] <sup>+</sup>                | <sup>c</sup> [d18:1] <sup>+</sup>                      | 30                   |
| MHC   | [M+H] <sup>+</sup>                | <sup>c</sup> [d18:1] <sup>+</sup>                      | 30                   |
| DAG   | [M+NH <sub>4</sub> ] <sup>+</sup> | [M+NH <sub>4</sub> -RCOONH <sub>4</sub> ] <sup>+</sup> | 25                   |
| TAG   | [M+NH <sub>4</sub> ] <sup>+</sup> | [M+NH <sub>4</sub> -RCOONH <sub>4</sub> ] <sup>+</sup> | 25                   |

<sup>a</sup>protonated phosphocholine ion, <sup>b</sup>loss of phosphoethanolamine, <sup>c</sup>sphingosine long chain base fragments
